# Supplementary material for: A method to assess obstetric outcomes using the 10-Group Classification System: a quantitative descriptive study
Source: PubMed Central journal article supplement — BMJ Open. 2017 Jul 12;7(7):e016192. doi: 10.1136/bmjopen-2017-016192 (PMC5726112; doi:10.1136/bmjopen-2017-016192), 2017-07-12
Supplement: bmjopen-2017-016192.draft_revisions.pdf [file bmjopen-2017-016192.draft_revisions.pdf]

# BMJ Open

## A method to assess obstetric outcomes using the 10-Group Classification System: a quantitative descriptive study

|                                    |                                                                                                                                                                                                                                                                                                                                                                                                                                                                                                                                                                                                                                                                                                                                                    |
|------------------------------------|----------------------------------------------------------------------------------------------------------------------------------------------------------------------------------------------------------------------------------------------------------------------------------------------------------------------------------------------------------------------------------------------------------------------------------------------------------------------------------------------------------------------------------------------------------------------------------------------------------------------------------------------------------------------------------------------------------------------------------------------------|
| Journal:                           | <i>BMJ Open</i>                                                                                                                                                                                                                                                                                                                                                                                                                                                                                                                                                                                                                                                                                                                                    |
| Manuscript ID                      | bmjopen-2017-016192                                                                                                                                                                                                                                                                                                                                                                                                                                                                                                                                                                                                                                                                                                                                |
| Article Type:                      | Research                                                                                                                                                                                                                                                                                                                                                                                                                                                                                                                                                                                                                                                                                                                                           |
| Date Submitted by the Author:      | 30-Jan-2017                                                                                                                                                                                                                                                                                                                                                                                                                                                                                                                                                                                                                                                                                                                                        |
| Complete List of Authors:          | Rossen, Janne; Sorlandet Hospital Kristiansand , Obstetric and Gynecology<br>Lucovnik, Miha; University Medical Center Ljubljana, Department of<br>Obstetrics and Gynecology, Division of Perinatology<br>Eggebø, Torbjørn; Stavanger University Hospital, Dept. of Obstetrics and<br>Gynecology<br>Tul, Natasa; University Medical Center Ljubljana, Department of Obstetrics<br>and Gynecology, Division of Perinatology<br>Murphy, Martina; National Maternity Hospital, University College Dublin,<br>Ireland. , Obstetrics and Gynecology<br>Vistad, Ingvild ; Sorlandet Hospital Kristiansand , Obstetric and Gynecology<br>Robson, Michael; National Maternity Hospital, University College Dublin,<br>Ireland. , Obstetrics and Gynecology |
| <b>Primary Subject<br>Heading</b>: | Obstetrics and gynaecology                                                                                                                                                                                                                                                                                                                                                                                                                                                                                                                                                                                                                                                                                                                         |
| Secondary Subject Heading:         | Epidemiology                                                                                                                                                                                                                                                                                                                                                                                                                                                                                                                                                                                                                                                                                                                                       |
| Keywords:                          | cesarean section, quality of care, the 10-Group Classification system, core<br>outcome, labor outcome, neonatal outcome                                                                                                                                                                                                                                                                                                                                                                                                                                                                                                                                                                                                                            |
|                                    |                                                                                                                                                                                                                                                                                                                                                                                                                                                                                                                                                                                                                                                                                                                                                    |

SCHOLARONE™  
Manuscripts

1  
2  
3 **A method to assess obstetric outcomes using the 10-Group Classification System: a**  
4  
5 **quantitative descriptive study**  
6  
7

8  
9  
10 Janne Rossen<sup>1,2</sup>, Miha Lucovnik<sup>3</sup>, Torbjørn Moe Eggebø<sup>2,4,5</sup>, Natasa Tul<sup>3</sup>, Martina Murphy<sup>6</sup>.

11  
12 Ingvild Vistad<sup>1</sup>, Michael Robson<sup>6</sup>  
13  
14

15  
16  
17  
18  
19  
20  
21  
22  
23  
24  
25  
26  
27 Corresponding author:  
28

29 Janne Rossen  
30

31 Department of Obstetrics and Gynecology, Sørlandet Sykehus, Kristiansand  
32

33 PB 416, 4604 Kristiansand  
34

35 Tel: +47 3807300  
36  
37

38 E-mail address: [janne.rossen@gmail.com](mailto:janne.rossen@gmail.com)  
39  
40  
41  
42  
43  
44  
45  
46  
47  
48  
49  
50  
51  
52  
53  
54  
55  
56  
57  
58  
59  
60

## ABSTRACT

**Objectives:** Internationally, the 10-Groups Classification System (TGCS) has been used to report cesarean section rates, but analysis of other outcomes are also recommended. We now aim to present the TGCS as a method to assess outcomes of labor and delivery using routine collection of perinatal information.

**Design:** A methodological study to describe the use of the TGCS

**Setting:** Stavanger University Hospital (SUH) Norway, National Maternity Hospital Dublin (NMH) Ireland and Slovenian National Perinatal Database (SLO) Slovenia

**Participants:** 9848 women from Stavanger University Hospital, Norway, 9250 women from National Maternity Hospital Dublin, Ireland and 106 167 women, from Slovenian National Perinatal Database, Slovenia

**Main outcome measures:** All women were classified according to the TGCS within which cesarean section, oxytocin augmentation, epidural analgesia, operative vaginal deliveries, episiotomy, sphincter rupture, postpartum hemorrhage, blood transfusion, maternal age>35 years, body mass index >30, Apgar score, umbilical cord pH, hypoxic ischemic encephalopathy, antepartum and perinatal deaths were incorporated.

**Results:** There were significant differences in the sizes of the groups of women and the incidences of events and outcomes within the TGCS between the three perinatal databases.

**Conclusions:** The TGCS is a standardized objective classification system where events and outcomes of labor and delivery can be incorporated. Obstetric core events and outcomes should be agreed and defined in order to set standards of care. This method provides continuous and available observations from delivery wards, possibly used for further interpretation, questions and international comparisons. The definition of quality may vary in different units and can only be ascertained when all the necessary information is available and considered together.

**Key words:**

Cesarean section, quality of care, labor outcome, neonatal outcome, the 10-Group Classification System, core outcome

**Abbreviations:**

SUH, Stavanger University Hospital; NMH, National Maternity Hospital; SLO, Slovenian National Perinatal Database; TGCS, the 10-Group Classification System; WHO, World Health Organization; FIGO, The International Federation of Gynecology and Obstetrics

**Strengths and limitations of this study:**

- This study proposes the use of an available method which may elaborate potential trends in delivery units and thus guide labor and delivery management
- Events and outcomes of labor are incorporated in the 10-Group Classification System from three different populations in Europe
- The 10-Group Classification System is limited by unclear definitions of some of the outcomes used and encourage the importance of an agreed set of obstetric core outcomes
- The design as a quantitative descriptive study limits the ability to explore causes of the different prevalence's of outcomes and events observed

## INTRODUCTION

Safety, consistency and quality in labor and delivery are key priorities for all labor and delivery units. It is difficult to determine what quality in labor and delivery is, but attempts to develop important outcomes are taking place (1-4). An agreed classification system, incorporating key outcomes that are objective, measurable and relevant to clinical practice is required in order to assess consistency and quality of care.

Clinical practice and guidelines do vary internationally and occasionally also nationally. However, agreeing on a standard classification for assessment of quality of care should be less contentious. It is essential that providers and users of maternity care are aware of events and outcomes in their units and in addition having the ability to compare their results objectively over time and to other units. Only then can assessment of the quality of care take place (5, 6). The emphasis on evidence-based medicine should be supported by prospective databases combined with a multidisciplinary quality audit programme. Acceptance and commitment to this philosophy will provide insight about labor and delivery and importantly ensuring that we are providing safe and quality care (7).

The 10-Group Classification System (TGCS) was first described in 2001 and originally popularized as a method to assess cesarean section rates (8). The intention however, was to introduce a generic perinatal classification to assess all perinatal events and outcomes of which cesarean section is only one. The way the ten groups are structured make them relevant to all clinicians and women themselves and can provide a common language and starting point for any discussion on safety, quality of care and perinatal audit (9). The TGCS is endorsed by the World Health Organization (WHO) and the International Federation of Gynecology and Obstetrics (FIGO) and increasingly used by labor and delivery units to report their cesarean section rates (10-18). The WHO and FIGO also recommend that other events and outcomes surrounding labor and delivery are analyzed in relation to cesarean section using this classification.

This paper classifies data from three perinatal databases in different countries and explores the usefulness of the TGCS as a method to assess the quality of care. It also discusses the challenges that occur even using a standard classification system.

## METHODS

Data related to pregnancies and deliveries were prospectively collected in Stavanger University Hospital (SUH) Norway 2010-2011, National Maternity Hospital Dublin (NMH) Ireland 2011 and Slovenian National Perinatal Database (SLO) Slovenia 2007-2011. The study population included 9848 women in SUH, 9250 women in NMH and 106 167 women in SLO. All women were classified according to the TGCS (Figure 1). Cesarean section was defined as after spontaneous onset, induction or pre-labor. Pre-pregnancy body mass index was calculated as weight in kilograms/height in meters squared. Episiotomies were either lateral or mediolateral and perineal tears affecting the external or the external and internal sphincter were classified as obstetric anal sphincter injuries. The attending midwife or obstetrician visually estimated blood loss and postpartum hemorrhage > 1000 millilitres were registered at SUH and NMH, and postpartum hemorrhage > 500 millilitres in SLO.

Perinatal deaths included all intrauterine deaths after 22 weeks gestational age and within the first week after delivery. Hypoxic ischemic encephalopathy was classified using the Sarnat or modified Sarnat definition as grade I (mild), grade II (moderate) and grade III (severe). All data are presented as descriptive statistic.

### Stavanger University Hospital

Stavanger University Hospital has a catchment population of approximately 320 000 and is the regional maternity unit in the west of Norway. It has a tradition of low obstetrical intervention rates. Women with one previous cesarean were encouraged to deliver vaginally. Information related to pregnancies and deliveries was prospectively collected and recorded in an electronic obstetrical journal system (Natus).

The Regional Committee for Medical and Health Research Ethics classified the study as a quality assurance study of routinely recorded data (REK Vest 2012/1522) and the local committee for data protection (2012/41) approved the project.

### National Maternity Hospital

The National Maternity Hospital is a tertiary referral maternity hospital in Dublin, Ireland and one of the largest labor and delivery units in Europe delivering over 9000 women a year. It is well known for its Active Management of Labor philosophy on labor (19). This package of care is based on the prevention of prolonged labor and the physical and emotional sequel that follow. Labor and delivery information is collected prospectively on an obstetrical and

1  
2  
3 neonatal database. The hospital has traditionally for many years completed an Annual Clinical  
4 Report detailing each year's results.  
5  
6

### 7 **Slovenian National Database**

8  
9 Slovenia is a European Union member state in Central Europe with approximately 2.1 million  
10 of inhabitants and 20 000 deliveries per year. Health care in Slovenia is a public service  
11 provided through the public health service network. Perinatal care is almost entirely covered  
12 by compulsory health insurance, which is publicly funded. Slovenia has had a National  
13 Perinatal Information System (NPIS) since 1987 and registration into a computerized database  
14 by the attending midwife and doctor is mandatory. Data from all 14 country's maternity unit  
15 are collected. To assure quality of data collection, controls are built in the computerized  
16 system and audited periodically.  
17  
18  
19  
20  
21  
22

### 23 **RESULTS**

24  
25 The populations contained 43%, 46% and 48% nulliparous women in SUH, NMH and SLO.  
26 The overall cesarean section rates were 13.6%, 21.4% and 17.4% in SUH, NMH and SLO,  
27 respectively. The highest rate of cesarean in groups 1 and 2a was observed in SLO. NMH  
28 presents the lowest rate of cesarean in group 3 and SUH the lowest rate in group 5. Rupture of  
29 the uterus was diagnosed in 0.02% (2/9848) women in SUH, no women in NMH and 0.04%  
30 (39/106 167) women in SLO during the study period. The relative sizes of the groups and  
31 cesarean section rates are presented in Table 1.  
32  
33  
34  
35  
36  
37

38 The overall pre-pregnant body mass index > 30 was 9.7%, 12.8%, 8.3% and the  
39 frequency of maternal age >35 years was 14.9%, 32.2%, 14.9% in SUH, NMH and SLO,  
40 respectively. Maternal characteristics stratified according to the TGCS are presented in Table  
41 2.  
42  
43  
44

45 The overall use of epidural analgesia varied from 35.0% at SUH and 49.0% at NMH  
46 to 2.7% in SLO. The overall operative vaginal delivery rate varied from 12.7%, 11.9% and  
47 3.2% in SUH, NMH and SLO, respectively. The overall induction rates were 20.1%, 24.9%  
48 and 23.5% and the frequencies of use of oxytocin were 23.6%, 28.3% and 57.3% in SUH,  
49 NMH and SLO. The overall rates of episiotomy were 19.7%, 28.7% and 32.0% and the rates  
50 of obstetric anal sphincter injuries were 1.5%, 1.5% and 0.3% in SUH, NMH and SLO,  
51 respectively. The overall red cell blood transfusion rate was 2.7%, 1.4% and 0.2% in SUH,  
52 NMH and SLO. Labor outcomes stratified according to the TGCS group's 1-5 are presented  
53 in Table 3 and 4.  
54  
55  
56  
57  
58  
59  
60

1  
2  
3 Overall perinatal death in SUH was 4.2 per 1000, in NMH 3.9 per 1000 and 5.0 per  
4 1000 (540/108070) in SLO. Perinatal deaths among groups 1 and 2 together were 1.3‰, 1.4‰  
5 and 1.2‰, among groups 3 and 4 together 0.1‰, 0.8‰ and 1.2‰ and among women with  
6 previous cesarean (group 5) 5.5‰, 0‰ and 0.9‰ in SUH, NMH and SLO, respectively.  
7  
8 Neonatal outcomes stratified according to the TGCS 1-5 are presented in Table 5.  
9  
10

## 11 **DISCUSSION**

12  
13  
14 Every labor and delivery unit has a responsibility to record and publish their results. The  
15  
16 results also need to be presented in a standardized and structured way, as the management and  
17  
18 implications will vary in different groups of women. Any one event or outcome cannot be  
19  
20 considered on their own without the understanding of any effects on other events, outcomes or  
21  
22 complications. Care during labor and delivery has changed dramatically over the last 30 years  
23  
24 (20). In particular, the cesarean section rate has risen and a common classification system  
25  
26 might be helpful exploring benefits and risks associated to this intervention.  
27  
28

### 29 **Limitations**

30  
31 Several challenges were discovered writing this manuscript. When comparing maternal, labor  
32  
33 and perinatal outcomes between units and countries, objective variables (blood transfusion  
34  
35 rates, perinatal deaths) have advantages over subjective assessed outcomes (postpartum  
36  
37 hemorrhage, Apgar score <7 and hypoxic ischemic encephalopathy). In addition, some of our  
38  
39 outcomes were differently defined and registered such as postpartum hemorrhage .This issue  
40  
41 has been recognized and highlighted as a general problem in clinical trials (3, 4, 28).  
42  
43 Standardizing and agreeing on which core outcomes to be used to assess quality would not  
44  
45 only increase the usefulness of the information collected but also encourage delivery units to  
46  
47 use the same definitions. Due to different databases and registration, we only succeeded in  
48  
49 completing Table 1 with data from all the 10 groups. Ensuring quality data from national  
50  
51 databases may be challenging and the low rates in SLO particularly of obstetric anal sphincter  
52  
53 injuries and transfusion rates should have been validated. Even more important is the need for  
54  
55 a structured and standardized collection and registration of defined core outcomes in delivery  
56  
57 units and in national registers.  
58  
59

60  
61 We present the use of the TGCS as a method of which possible patterns within the  
62  
63 observed population may uncover. By comparing outcomes and events between standardized



1  
2  
3 groups of women, hypotheses requiring further attention might be suggested. However, to  
4 explore causality further studies are needed.  
5  
6

### 7 8 **The 10-Group Classification System**

9  
10 To achieve good data quality, proper registration and standardized definitions of outcomes are  
11 essential. The ability to classify all deliveries into one of the ten groups is however a quality  
12 indicator which many institutions, countries and perinatal databases struggle to do (5). By  
13 presenting data using the TGCS, the ability to demonstrate significant differences in smaller  
14 units is limited. However, examining even a small number of cases may be helpful to develop  
15 local strategies to improve the quality of care (14). Risk is not only the chance of certain  
16 events occurring but also the implications if it did occur.  
17  
18

19  
20  
21 The TGCS presents a method of risk stratification, which visualizes how the cesarean  
22 section rate varies between different units and countries. Interpretation of other outcomes in  
23 the different groups may be used as a guidance to assess obstetric quality. Cesarean section  
24 rates can only be evaluated if perinatal and maternal outcomes are included (14, 21). Using  
25 the TGCS, there are only three possible explanations for differences in the sizes of the groups  
26 and the events and outcomes within the groups: data quality, significant differences in  
27 important epidemiological variables and differences in clinical practice (9).  
28  
29

30  
31  
32 To improve management in labor and optimizing care, collection and simple  
33 interpretation of data are necessary (1). The data quality must be validated and by working  
34 together at multiple levels within the unit, improvements and adverse trends can be detected  
35 (2). The TGCS is shown to be consistent in size and the different cesarean section rates in the  
36 groups together with the size allow an informative interpretation of a given overall cesarean  
37 section rate (Table 1). When other epidemiological information, events, outcomes and  
38 processes are analyzed within the different groups as opposed to a proportion of the overall  
39 population, they increase in relevance. The TGCS do not adjust for risk factors, but by  
40 quantifying patient's populations and different practice patterns it allows a comparison of  
41 clinical value and may encourage a more in depth analysis of individual groups or sub-groups.  
42  
43 Following are some examples of how our observations may be interpreted.  
44  
45

46  
47  
48 Focusing on the management of both physical and emotional care of nulliparous  
49 women (group 1) is important as this will prevent the cesarean rate from a further increase  
50 when these women return for a future delivery (22, 23). SLO has an overall lower cesarean  
51 section rate than NMH, but a higher cesarean section rate of 10% in group 1 (Table 1). Table  
52  
53  
54  
55  
56  
57  
58  
59  
60

1  
2  
3 5 shows that lower cesarean section rates at SUH and NMH do not compromise good  
4 perinatal outcome.  
5

6 A greater than a 2:1 ratio of the size of groups 1 and 2 reflects a low intervention rate  
7 in term single cephalic nulliparous women (5). This is influenced by culture, obstetric practice  
8 and case mix of the particular population. The ratios in our populations were 3.1, 1.7, and 3.3,  
9 SUH, NMH, SLO, respectively. The benefits of labor induction must be weighed against the  
10 potential maternal and fetal risks associated with the procedure as well as knowledge of the  
11 population and the incidence of antenatal stillbirths (22, 24). Maternity care before and in  
12 relation to the management of labor will further influence to which group and following risk  
13 the woman belongs to in her next pregnancy (group 3, 4 or 5) (10). The rate of cesarean  
14 section in the subsequent pregnancy was 5.3%, 3.8%, 5.1% (SUH, NMH, SLO respectively)  
15 in women without a previous cesarean (group 3 and 4 combined) compared to 46.0%, 60.5%,  
16 74.7% (SUH, NMH SLO respectively) in women with a previous cesarean (group 5).  
17

18 As presented in Table 2, the women delivering at NMH were in all groups older than  
19 the women delivering at SUH and in SLO. When comparing cesarean section rates (Table 1),  
20 the low rate at NMH in group 1 might reflect a certain type of labor management as high  
21 maternal age rather is associated with increased incidence of interventions.  
22

23 SUH has the lowest cesarean section rate and the lowest use of oxytocin. Compared to  
24 NMH and their philosophy of prevention of prolonged labor this may lead to more labors that  
25 are prolonged. The package of Active Management of Labor with one to one care and its  
26 advantages has always been an issue of much debate (25). The role of oxytocin in labor  
27 management is essential, but the optimal dose and timing is yet to be revealed (26). In  
28 addition, by using the TGCS, a higher rate of obstetric anal sphincter injuries among women  
29 in group 2a and 5 at SUH is detected which should encourage closer investigation. The  
30 overall rate of severe postpartum hemorrhage at SUH, is relatively at least, high and in  
31 addition proportionally higher transfusion rates (27). This highlights the importance of  
32 analyzing both subjective (estimated blood loss) outcomes together with objective  
33 (transfusion rates) when evaluating obstetric practice (28, 29).  
34

35 Compared to SUH and NMH, the operative vaginal delivery rate is lower in SLO. The  
36 risk of adverse maternal and neonatal outcomes increases with an operative vaginal delivery  
37 but if the alternative is a cesarean at full dilatation, the risk benefit ratio must be carefully  
38 considered (30). Occurrence of maternal and neonatal complications is, however, similar to  
39 SUH and NMH with the exception of lower sphincter rupture rates in all groups.  
40  
41  
42  
43  
44  
45  
46  
47  
48  
49  
50  
51  
52  
53  
54  
55  
56  
57  
58  
59  
60

## Conclusion

We present cesarean section rates, maternal characteristics together with labor and fetal outcomes using the TGCS as a starting point. This is a systematic method of assessing the events and outcomes, which may contribute to the judgment of quality of care in labor and delivery. We encourage other labor and delivery wards to make use of the same classification and then by working together and sharing our knowledge we can learn from each other. The first step in providing quality of care is to be aware of your results.

## Authors affiliations:

<sup>1</sup> Department of Obstetrics and Gynecology, Sørlandet Hospital HF Kristiansand, Norway,

<sup>2</sup> Department of Laboratory Medicine, Children's and Women's Health, Norwegian University of Science and Technology, Trondheim, Norway,

<sup>3</sup> Department of Perinatology, Division of Obstetrics and Gynecology, University Medical Center Ljubljana, Slovenia,

<sup>4</sup> Department of Obstetrics and Gynecology, Stavanger University Hospital, Norway, <sup>5</sup> National Center for Fetal Medicine, Trondheim University Hospital, St Olavs Hospital, Trondheim, Norway,

<sup>6</sup> National Maternity Hospital, Dublin, Ireland

**Contributors:** JR, ML, TME and MR have contributed to the idea and design of the study.

JR, ML, NT, MM and TME have contributed to the preparation of the data used. JR, TME, IV and MR have assisted the literature research and editing of the manuscript. All authors have read and approved the final manuscript.

**Funding:** The authors have no financial and material support to report.

**Conflicts of interest notification:** Michael Robson developed the 10-Group classification system. The authors have no conflicts of interest.

1. Sibanda T, Fox R, Draycott TJ, Mahmood T, Richmond D, Simms RA. Intrapartum care quality indicators: a systematic approach for achieving consensus. *Eur J Obstet Gynecol Reprod Biol.* 2013;166(1):23-9.
2. Sprague AE, Dunn SI, Fell DB, Harrold J, Walker MC, Kelly S, et al. Measuring quality in maternal-newborn care: developing a clinical dashboard. *J Obstet Gynaecol Can.* 2013;35(1):29-38.
3. Khan K, Chief Editors of Journals participating in The CI. The CROWN Initiative: journal editors invite researchers to develop core outcomes in women's health. *BJOG.* 2016;123 Suppl 3:103-4.
4. Geirsson RT, Eggebo T. Core outcomes for reporting women's health. *Acta Obstet Gynecol Scand.* 2014;93(9):843-4.
5. Robson M, Hartigan L, Murphy M. Methods of achieving and maintaining an appropriate caesarean section rate. *Best Pract Res Clin Obstet Gynaecol.* 2013;27:297-308.
6. Gee RE, Winkler R. Quality measurement: what it means for obstetricians and gynecologists. *Obstet Gynecol.* 2013;121(3):507-10.
7. Lawrence HC, 3rd, Copel JA, O'Keeffe DF, Bradford WC, Scarrow PK, Kennedy HP, et al. Quality patient care in labor and delivery: a call to action. *Am J Obstet Gynecol.* 2012;207(3):147-8.
8. Robson MS. Classification of caesarean sections. *Fetal Matern Med Rev.* 2001;Vol.12(1):23-39.
9. Robson M. The Ten Group Classification System (TGCS) - a common starting point for more detailed analysis. *BJOG.* 2015;122(5):701.
10. Brennan DJ, Robson MS, Murphy M, O'Herlihy C. Comparative analysis of international cesarean delivery rates using 10-group classification identifies significant variation in spontaneous labor. *Am J Obstet Gynecol.* 2009;201(3):308 e1-8.
11. Fischer A, LaCoursiere DY, Barnard P, Bloebaum L, Varner M. Differences between hospitals in cesarean rates for term primigravidas with cephalic presentation. *Obstet Gynecol.* 2005;105(4):816-21.
12. Scarella A, Chamy V, Sepulveda M, Belizan JM. Medical audit using the Ten Group Classification System and its impact on the cesarean section rate. *European Journal of Obstetrics, Gynecology, and Reproductive Biology.* 2011;154(2):136-40.
13. Ciriello E, Locatelli A, Incerti M, Ghidini A, Andreani M, Plevani C, et al. Comparative analysis of cesarean delivery rates over a 10-year period in a single Institution using 10-class classification. *J Matern Fetal Neonatal Med.* 2012;25(12):2717-20.
14. Homer CS, Kurinczuk JJ, Spark P, Brocklehurst P, Knight M. A novel use of a classification system to audit severe maternal morbidity. *Midwifery.* 2010;26(5):532-6.
15. Betran AP, Torloni MR, Zhang JJ, Gulmezoglu AM, Section WHOWGoC. WHO Statement on Caesarean Section Rates. *BJOG.* 2016;123(5):667-70.
16. Figo Working Group On Challenges In Care Of M, Infants During L, Delivery. Best practice advice on the 10-Group Classification System for cesarean deliveries. *Int J Gynaecol Obstet.* 2016;135(2):232-3.
17. Chong C, Su LL, Biswas A. Changing trends of cesarean section births by the Robson Ten Group Classification in a tertiary teaching hospital. *Acta Obstet Gynecol Scand.* 2012;91(12):1422-7.

- 1
  - 2
  - 3
  - 4
  - 5
  - 6
  - 7
  - 8
  - 9
  - 10
  - 11
  - 12
  - 13
  - 14
  - 15
  - 16
  - 17
  - 18
  - 19
  - 20
  - 21
  - 22
  - 23
  - 24
  - 25
  - 26
  - 27
  - 28
  - 29
  - 30
  - 31
  - 32
  - 33
  - 34
  - 35
  - 36
  - 37
  - 38
  - 39
  - 40
  - 41
  - 42
  - 43
  - 44
  - 45
  - 46
  - 47
  - 48
  - 49
  - 50
  - 51
  - 52
  - 53
  - 54
  - 55
  - 56
  - 57
  - 58
  - 59
  - 60
18. Minsart AF, De Spiegelaere M, Englert Y, Buekens P. Classification of cesarean sections among immigrants in Belgium. *Acta Obstet Gynecol Scand*. 2013;92(2):204-9.
19. O'Driscoll K, Foley M, MacDonald D. Active management of labor as an alternative to cesarean section for dystocia. *Obstetrics and Gynecology*. 1984;63(4):485-90.
20. Laughon SK, Branch DW, Beaver J, Zhang J. Changes in labor patterns over 50 years. *Am J Obstet Gynecol*. 2012;206(5):419 e1-9.
21. Nippita TA, Lee YY, Patterson JA, Ford JB, Morris JM, Nicholl MC, et al. Variation in hospital caesarean section rates and obstetric outcomes among nulliparae at term: a population-based cohort study. *BJOG*. 2015;122(5):702-11.
22. Brennan DJ, Murphy M, Robson MS, O'Herlihy C. The singleton, cephalic, nulliparous woman after 36 weeks of gestation: contribution to overall cesarean delivery rates. *Obstet Gynecol*. 2011;117(2 Pt 1):273-9.
23. Barber EL, Lundsberg LS, Belanger K, Pettker CM, Funai EF, Illuzzi JL. Indications contributing to the increasing cesarean delivery rate. *Obstet Gynecol*. 2011;118(1):29-38.
24. ACOG Practice Bulletin No. 107: Induction of labor. *Obstetrics and gynecology*. 2009;Aug;114(2 Pt 1):386-97.
25. Brown HC, Paranjothy S, Dowswell T, Thomas J. Package of care for active management in labour for reducing caesarean section rates in low-risk women. *Cochrane Database Syst Rev*. 2013;9:CD004907.
26. Rossen J, Ostborg TB, Lindtjorn E, Schulz J, Eggebo TM. Judicious use of oxytocin augmentation for the management of prolonged labor. *Acta Obstet Gynecol Scand*. 2016;95(3):355-61.
27. Mousa HA, Alfirevic Z. Treatment for primary postpartum haemorrhage. *Cochrane Database Syst Rev*. 2007(1):CD003249.
28. Rath WH. Postpartum hemorrhage--update on problems of definitions and diagnosis. *Acta Obstet Gynecol Scand*. 2011;90(5):421-8.
29. Woiski MD, Scheepers HC, Liefers J, Lance M, Middeldorp JM, Lotgering FK, et al. Guideline-based development of quality indicators for prevention and management of postpartum hemorrhage. *Acta Obstet Gynecol Scand*. 2015;94(10):1118-27.
30. Walsh CA, Robson M, McAuliffe FM. Mode of delivery at term and adverse neonatal outcomes. *Obstet Gynecol*. 2013;121(1):122-8.

**Legends:**

Table 1 The 10-Group Classification System for Stavanger University Hospital, Norway, National Maternity Hospital Dublin, Ireland, Slovenian National Perinatal Database, Slovenia 2007-2011

Table 2 Maternal characteristics stratified in the 10-Group Classification System groups 1-5

Table 3 Labor outcomes stratified in the 10-Group Classification System groups 1-5

Table 4 Labor outcomes stratified in the 10-Group Classification System groups 1-5

Table 5 Neonatal outcomes stratified in the 10-Group Classification System groups 1-5

Figure 1 The 10-Group Classification System

Table 1 The 10-Group Classification System for Stavanger University Hospital, Norway, National Maternity Hospital Dublin, Ireland, Slovenian National Perinatal Database, Slovenia 2007-2011

|          | Relative size of the group (%) |      |      | CD rate in each group (%) |                    |                       | Contribution made to overall CD rate (%) |                        |                        |
|----------|--------------------------------|------|------|---------------------------|--------------------|-----------------------|------------------------------------------|------------------------|------------------------|
|          | SUH                            | NMH  | SLO  | SUH<br>(340/9848)         | NMH<br>(1980/9250) | SLO<br>(18454/106167) | SUH<br>CD rate<br>13.6                   | NMH<br>CD rate<br>21.4 | SLO<br>CD rate<br>17.4 |
| Overall  |                                |      |      |                           |                    |                       |                                          |                        |                        |
| Group 1  | 28.9                           | 25.8 | 33.2 | 6.5                       | 7.4                | 10.0                  | 1.9                                      | 1.9                    | 3.3                    |
| Group 2  | 9.3                            | 14.8 | 10.1 | 25.7                      | 34.9               | 30.4                  | 2.4                                      | 5.3                    | 3.1                    |
| Group 2a | 8.6                            | 13.8 | 9.1  | 19.6                      | 30.2               | 23.0                  | 1.7                                      | 4.2                    | 2.1                    |
| Group 2b | 0.5                            | 1.0  | 1.0  | 100.0                     | 100.0              | 100.0                 | 0.5                                      | 1.0                    | 1.0                    |
| Group 3  | 37.9                           | 29.8 | 32.3 | 1.7                       | 1.1                | 2.4                   | 0.6                                      | 0.3                    | 0.8                    |
| Group 4  | 9.7                            | 9.4  | 8.8  | 19.5                      | 12.7               | 14.9                  | 1.9                                      | 1.2                    | 1.3                    |
| Group 4a | 8.4                            | 8.7  | 7.9  | 6.4                       | 5.8                | 4.2                   | 0.5                                      | 0.5                    | 0.3                    |
| Group 4b | 1.3                            | 0.7  | 1.0  | 100.0                     | 100.0              | 100.0                 | 1.3                                      | 0.7                    | 1.0                    |
| Group 5  | 5.5                            | 10.2 | 4.8  | 46.0                      | 60.9               | 74.7                  | 2.5                                      | 6.2                    | 3.6                    |
| Group 6  | 1.8                            | 2.4  | 2.3  | 79.4                      | 93.2               | 82.6                  | 1.5                                      | 2.2                    | 1.9                    |
| Group 7  | 1.0                            | 1.4  | 1.1  | 66.7                      | 85.0               | 71.7                  | 0.6                                      | 1.2                    | 0.8                    |
| Group 8  | 1.7                            | 2.2  | 1.8  | 40.8                      | 64.9               | 54.2                  | 0.7                                      | 1.4                    | 1.0                    |
| Group 9  | 0.2                            | 0.4  | 0.6  | 100.0                     | 100                | 92.8                  | 0.2                                      | 0.4                    | 0.6                    |
| Group 10 | 4.0                            | 3.7  | 4.9  | 31.9                      | 37.6               | 22.1                  | 1.3                                      | 1.4                    | 1.1                    |

SUH, Stavanger University Hospital 2010-2011; NMH, National Maternity Hospital 2011; SLO, Slovenian National Perinatal Database 2007-2011

Table 2: Maternal characteristics stratified in the 10-Group Classification System groups 1-5

|          | Body mass index > 30 |      |      | Maternal age > 35 years |      |      |
|----------|----------------------|------|------|-------------------------|------|------|
|          | %                    |      |      | %                       |      |      |
|          | SUH                  | NMH  | SLO  | SUH                     | NMH  | SLO  |
| Group 1  | 5.3                  | 8.1  | 5.1  | 5.2                     | 16.7 | 6.3  |
| Group 2a | 10.3                 | 12.7 | 11.0 | 10.7                    | 25.4 | 8.1  |
| Group 2b | 9.8                  | 11.2 | 11.6 | 21.7                    | 46.7 | 23.4 |
| Group 3  | 6.1                  | 11.4 | 8.2  | 18.5                    | 37.3 | 20.5 |
| Group 4a | 12.6                 | 16.1 | 14.9 | 23.0                    | 45.9 | 23.7 |
| Group 4b | 16.7                 | 14.3 | 16.6 | 32.8                    | 57.1 | 27.8 |
| Group 5  | 11.6                 | 19.1 | 14.8 | 26.7                    | 46.2 | 23.8 |

SUH, Stavanger University Hospital 2010-2011; NMH, National Maternity Hospital 2011; SLO, Slovenian National Perinatal Database 2007-2011



Table 3 Labor outcomes stratified in the 10-Group Classification System groups 1-5

|          | Episiotomy |      |      | Obstetric anal sphincter injuries |     |     | Duration of labor > 12 hours |     |     | Operative vaginal delivery |      |     |
|----------|------------|------|------|-----------------------------------|-----|-----|------------------------------|-----|-----|----------------------------|------|-----|
|          | %          |      |      | %                                 |     |     | %                            |     |     | %                          |      |     |
|          | SUH        | NMH  | SLO  | SUH                               | NMH | SLO | SUH                          | NMH | SLO | SUH                        | NMH  | SLO |
| Group 1  | 35.8       | 56.8 | 50.9 | 2.4                               | 2.5 | 0.4 | 11.3                         | 2.8 | 1.2 | 23.7                       | 24.6 | 5.9 |
| Group 2a | 40.6       | 46.1 | 45.8 | 3.7                               | 2.2 | 0.4 | 9.9                          | 5.8 | 1.6 | 31.9                       | 23.4 | 7.2 |
| Group 2b | -          | -    | -    | -                                 | -   | -   | -                            | -   | -   | -                          | -    | -   |
| Group 3  | 7.3        | 8.8  | 20.4 | 0.6                               | 1.0 | 0.2 | 2.5                          | 0.2 | 0.1 | 3.5                        | 2.5  | 0.7 |
| Group 4a | 11.8       | 12.2 | 21.8 | 0.6                               | 0.6 | 0.2 | 3.4                          | 0.4 | 0.2 | 6.7                        | 4.9  | 1.3 |
| Group 4b | -          | -    | -    | -                                 | -   | -   | -                            | -   | -   | -                          | -    | -   |
| Group 5  | 17.9       | 18.7 | 12.1 | 2.4                               | 0.6 | 0.1 | 10.1                         | 0.1 | 0.2 | 13.8                       | 8.3  | 1.7 |

SUH, Stavanger University Hospital 2010-2011; NMH, National Maternity Hospital 2011; SLO, Slovenian National Perinatal Database 2007-2011

-, not applicable

Table 4 Labor outcomes stratified in the 10-Groups Classification System groups 1-5

|          | Acceleration with Oxytocin<br>% |      |      | Epidural in labor<br>% |      |     | Postpartum hemorrhage<br>> 1000 milliliters<br>% |     |     | Transfusions<br>% |     |     |
|----------|---------------------------------|------|------|------------------------|------|-----|--------------------------------------------------|-----|-----|-------------------|-----|-----|
|          | SUH                             | NMH  | SLO  | SUH                    | NMH  | SLO | SUH                                              | NMH | SLO | SUH               | NMH | SLO |
| Group 1  | 33.2                            | 53.2 | 69.1 | 43.7                   | 73.7 | 4.2 | 4.5                                              | 1.0 | x   | 2.6               | 1.5 | 0.2 |
| Group 2a | 68.3                            | 69.0 | 79.4 | 71.8                   | 76.1 | 5.3 | 9.9                                              | 3.1 | x   | 2.2               | 3.1 | 0.2 |
| Group 2b | -                               | -    | -    | -                      | -    | -   | 17.6                                             | 1.1 | x   | 2.0               | x   | 0.4 |
| Group 3  | 6.7                             | 4.0  | 43.5 | 19.2                   | 34.9 | 1.2 | 2.5                                              | 0.5 | x   | 2.8               | 0.7 | 0.1 |
| Group 4a | 46.9                            | 25.0 | 68.5 | 44.7                   | 48.2 | 2.6 | 4.1                                              | 1.1 | x   | 3.0               | 1.0 | 0.3 |
| Group 4b | -                               | -    | -    | -                      | -    | -   | 5.6                                              | 4.8 | x   | 1.6               | x   | 0.6 |
| Group 5  | 12.7                            | 9.0  | 23.0 | 39.8                   | 31.7 | 1.5 | 5.7                                              | 1.6 | x   | 1.8               | 2.0 | 0.2 |

SUH, Stavanger University Hospital 2010-2011; NMH, National Maternity Hospital 2011; SLO, Slovenian National Perinatal Database 2007-2011

-, not applicable

X; missing data

Table 5 Neonatal outcomes stratified in the 10-Group Classification System groups 1-5

1  
2  
3  
4  
5  
6  
7  
8  
9  
10  
11  
12  
13  
14  
15  
16  
17  
18  
19  
20  
21  
22  
23  
24  
25  
26  
27  
28  
29  
30  
31  
32  
33  
34  
35  
36  
37  
38  
39  
40  
41  
42  
43  
44  
45  
46  
47  
48  
49  
50  
51  
52  
53  
54  
55  
56  
57  
58  
59  
60

|          | Apgar score <7 |     |     | Umbilical cord |     |     | Antepartum |     |     | Hypoxic-ischemic |     |     | Perinatal |     |     |
|----------|----------------|-----|-----|----------------|-----|-----|------------|-----|-----|------------------|-----|-----|-----------|-----|-----|
|          | at 5 min       |     |     | pH<7.0         |     |     | death      |     |     | encephalopathy   |     |     | death     |     |     |
|          | %              |     |     | %              |     |     | ‰          |     |     | ‰                |     |     | ‰         |     |     |
|          | SUH            | NMH | SLO | SUH            | NMH | SLO | SUH        | NMH | SLO | SUH              | NMH | SLO | SUH       | NMH | SLO |
| Group 1  | 0.9            | 1.1 | 0.4 | 0.6            | 0.5 | x   | 0.7        | 0   | 0.5 | 1.1              | 3.4 | 0.8 | 1.1       | 0   | 0.7 |
| Group 2a | 2.5            | 1.6 | 0.8 | 0.5            | 0.3 | x   | 2.4        | 3.1 | 3.0 | 1.1              | 4.3 | 1.4 | 2.4       | 3.9 | 3.2 |
| Group 2b | 0              | x   | 0.7 | 0              | x   | x   | 0          | 0   | 0.9 | 0                | 0.1 | 1.6 | 0         | 0   | 1.9 |
| Group 3  | 0.4            | 0.3 | 0.1 | 0.2            | 0   | x   | 0.5        | 0.4 | 0.5 | 0.5              | 0.4 | 0.3 | 0.5       | 0.4 | 0.6 |
| Group 4a | 0.2            | 0.9 | 0.3 | 0.4            | 0.9 | x   | 2.4        | 1.2 | 3.6 | 0                | 0   | 0.5 | 2.4       | 2.3 | 3.9 |
| Group 4b | 0              | x   | 0.8 | 0              | x   | x   | 7.5        | 0   | 1.0 | 0                | 0.3 | 0.7 | 7.5       | 0   | 0.1 |
| Group 5  | 1.3            | 0.2 | 0.6 | 0              | 0.4 | x   | 5.5        | 0   | 0.8 | 1.8              | 0   | 0.6 | 5.5       | 0   | 1.0 |

SUH, Stavanger University Hospital 2010-2011; NMH, National Maternity Hospital 2011; SLO, Slovenian National Perinatal Database 2007-2011

x; missing data

Figure 1 The 10-Group Classification System

| Group | Description                                                                                         |
|-------|-----------------------------------------------------------------------------------------------------|
| 1     | Nulliparous, single cephalic, $\geq 37$ weeks, spontaneous labor                                    |
| 2a    | Nulliparous, single cephalic, $\geq 37$ weeks, induced labor                                        |
| 2b    | Nulliparous, single cephalic, $\geq 37$ weeks, cesarean before labor                                |
| 3     | Multiparous (excluding previous cesareans), single cephalic, $\geq 37$ weeks, spontaneous labor     |
| 4a    | Multiparous (excluding previous cesareans), single cephalic, $\geq 37$ weeks, induced labor         |
| 4b    | Multiparous (excluding previous cesareans), single cephalic, $\geq 37$ weeks, cesarean before labor |
| 5     | Previous cesarean, single cephalic $\geq 37$ weeks                                                  |
| 6     | All nulliparous breeches                                                                            |
| 7     | All multiparous breeches (including previous cesareans)                                             |
| 8     | All multiple pregnancies (including previous cesareans)                                             |
| 9     | All abnormal lies (including previous cesareans)                                                    |
| 10    | All single cephalic, $\leq 36$ weeks (including previous cesareans)                                 |

**STROBE 2007 (v4) checklist of items to be included in reports of observational studies in epidemiology\***  
**Checklist for cohort, case-control, and cross-sectional studies (combined)**

| Section/Topic             | Item # | Recommendation                                                                                                                                                                                                                                                                                                                                                                                                                                                         | Reported on page # |
|---------------------------|--------|------------------------------------------------------------------------------------------------------------------------------------------------------------------------------------------------------------------------------------------------------------------------------------------------------------------------------------------------------------------------------------------------------------------------------------------------------------------------|--------------------|
| Title and abstract        | 1      | (a) Indicate the study's design with a commonly used term in the title or the abstract                                                                                                                                                                                                                                                                                                                                                                                 | 1 and 2            |
|                           |        | (b) Provide in the abstract an informative and balanced summary of what was done and what was found                                                                                                                                                                                                                                                                                                                                                                    | 2                  |
| <b>Introduction</b>       |        |                                                                                                                                                                                                                                                                                                                                                                                                                                                                        |                    |
| Background/rationale      | 2      | Explain the scientific background and rationale for the investigation being reported                                                                                                                                                                                                                                                                                                                                                                                   | 4                  |
| Objectives                | 3      | State specific objectives, including any pre-specified hypotheses                                                                                                                                                                                                                                                                                                                                                                                                      | 4                  |
| <b>Methods</b>            |        |                                                                                                                                                                                                                                                                                                                                                                                                                                                                        |                    |
| Study design              | 4      | Present key elements of study design early in the paper                                                                                                                                                                                                                                                                                                                                                                                                                | 4, introduction    |
| Setting                   | 5      | Describe the setting, locations, and relevant dates, including periods of recruitment, exposure, follow-up, and data collection                                                                                                                                                                                                                                                                                                                                        | 5 and 6            |
| Participants              | 6      | (a) <i>Cohort study</i> —Give the eligibility criteria, and the sources and methods of selection of participants. Describe methods of follow-up<br><i>Case-control study</i> —Give the eligibility criteria, and the sources and methods of case ascertainment and control selection. Give the rationale for the choice of cases and controls<br><i>Cross-sectional study</i> —Give the eligibility criteria, and the sources and methods of selection of participants | 5 and 6            |
|                           |        | (b) <i>Cohort study</i> —For matched studies, give matching criteria and number of exposed and unexposed<br><i>Case-control study</i> —For matched studies, give matching criteria and the number of controls per case                                                                                                                                                                                                                                                 | Not applicable     |
| Variables                 | 7      | Clearly define all outcomes, exposures, predictors, potential confounders, and effect modifiers. Give diagnostic criteria, if applicable                                                                                                                                                                                                                                                                                                                               | 5                  |
| Data sources/ measurement | 8*     | For each variable of interest, give sources of data and details of methods of assessment (measurement). Describe comparability of assessment methods if there is more than one group                                                                                                                                                                                                                                                                                   | Not applicable     |
| Bias                      | 9      | Describe any efforts to address potential sources of bias                                                                                                                                                                                                                                                                                                                                                                                                              | 5 and 6            |
| Study size                | 10     | Explain how the study size was arrived at                                                                                                                                                                                                                                                                                                                                                                                                                              | 5                  |
| Quantitative variables    | 11     | Explain how quantitative variables were handled in the analyses. If applicable, describe which groupings were chosen and why                                                                                                                                                                                                                                                                                                                                           | 5                  |
| Statistical methods       | 12     | (a) Describe all statistical methods, including those used to control for confounding                                                                                                                                                                                                                                                                                                                                                                                  | Not applicable     |
|                           |        | (b) Describe any methods used to examine subgroups and interactions                                                                                                                                                                                                                                                                                                                                                                                                    | Not applicable     |
|                           |        | (c) Explain how missing data were addressed                                                                                                                                                                                                                                                                                                                                                                                                                            | Excluded           |
|                           |        | (d) <i>Cohort study</i> —If applicable, explain how loss to follow-up was addressed<br><i>Case-control study</i> —If applicable, explain how matching of cases and controls was addressed                                                                                                                                                                                                                                                                              | Nor applicable     |

|                   |     |                                                                                                                                                                                                              |                                                                                                                        |
|-------------------|-----|--------------------------------------------------------------------------------------------------------------------------------------------------------------------------------------------------------------|------------------------------------------------------------------------------------------------------------------------|
|                   |     | <i>Cross-sectional study</i> —If applicable, describe analytical methods taking account of sampling strategy                                                                                                 |                                                                                                                        |
|                   |     | (e) Describe any sensitivity analyses                                                                                                                                                                        | Not applicable                                                                                                         |
| <b>Results</b>    |     |                                                                                                                                                                                                              |                                                                                                                        |
| Participants      | 13* | (a) Report numbers of individuals at each stage of study—eg numbers potentially eligible, examined for eligibility, confirmed eligible, included in the study, completing follow-up, and analysed            | 5 and Table 1                                                                                                          |
|                   |     | (b) Give reasons for non-participation at each stage                                                                                                                                                         | Not applicable                                                                                                         |
|                   |     | (c) Consider use of a flow diagram                                                                                                                                                                           | Not applicable                                                                                                         |
| Descriptive data  | 14* | (a) Give characteristics of study participants (eg demographic, clinical, social) and information on exposures and potential confounders                                                                     | Table 1 and 2                                                                                                          |
|                   |     | (b) Indicate number of participants with missing data for each variable of interest                                                                                                                          | Table 1                                                                                                                |
|                   |     | (c) <i>Cohort study</i> —Summarise follow-up time (eg, average and total amount)                                                                                                                             | 5 (MM)                                                                                                                 |
| Outcome data      | 15* | <i>Cohort study</i> —Report numbers of outcome events or summary measures over time                                                                                                                          |                                                                                                                        |
|                   |     | <i>Case-control study</i> —Report numbers in each exposure category, or summary measures of exposure                                                                                                         |                                                                                                                        |
|                   |     | <i>Cross-sectional study</i> —Report numbers of outcome events or summary measures                                                                                                                           | Table 3,4 and 5                                                                                                        |
| Main results      | 16  | (a) Give unadjusted estimates and, if applicable, confounder-adjusted estimates and their precision (eg, 95% confidence interval). Make clear which confounders were adjusted for and why they were included | Table 1-5. Confidence intervals can be calculated, but are not included                                                |
|                   |     | (b) Report category boundaries when continuous variables were categorized                                                                                                                                    | Not applicable                                                                                                         |
|                   |     | (c) If relevant, consider translating estimates of relative risk into absolute risk for a meaningful time period                                                                                             | Not applicable                                                                                                         |
| Other analyses    | 17  | Report other analyses done—eg analyses of subgroups and interactions, and sensitivity analyses                                                                                                               |                                                                                                                        |
| <b>Discussion</b> |     |                                                                                                                                                                                                              |                                                                                                                        |
| Key results       | 18  | Summarise key results with reference to study objectives                                                                                                                                                     | 8                                                                                                                      |
| Limitations       | 19  | Discuss limitations of the study, taking into account sources of potential bias or imprecision. Discuss both direction and magnitude of any potential bias                                                   | 7 and 8                                                                                                                |
| Interpretation    | 20  | Give a cautious overall interpretation of results considering objectives, limitations, multiplicity of analyses, results from similar studies, and other relevant evidence                                   | This method of the expanded use of TGCS is earlier not presented. Limitations (page 7 and 8) and interpretations (page |

|                          |    |                                                                                                                                                               |                            |
|--------------------------|----|---------------------------------------------------------------------------------------------------------------------------------------------------------------|----------------------------|
|                          |    |                                                                                                                                                               | 8-10) are being discussed. |
| Generalisability         | 21 | Discuss the generalisability (external validity) of the study results                                                                                         | 8 and 10 (conclusion)      |
| <b>Other information</b> |    |                                                                                                                                                               |                            |
| Funding                  | 22 | Give the source of funding and the role of the funders for the present study and, if applicable, for the original study on which the present article is based | 11 (not applicable)        |

\*Give information separately for cases and controls in case-control studies and, if applicable, for exposed and unexposed groups in cohort and cross-sectional studies.

**Note:** An Explanation and Elaboration article discusses each checklist item and gives methodological background and published examples of transparent reporting. The STROBE checklist is best used in conjunction with this article (freely available on the Web sites of PLoS Medicine at <http://www.plosmedicine.org/>, Annals of Internal Medicine at <http://www.annals.org/>, and Epidemiology at <http://www.epidem.com/>). Information on the STROBE Initiative is available at [www.strobe-statement.org](http://www.strobe-statement.org).

# BMJ Open

## A method to assess obstetric outcomes using the 10-Group Classification System: a quantitative descriptive study

|                                    |                                                                                                                                                                                                                                                                                                                                                                                                                                                                                                                                                                                                                                                                                                                                                    |
|------------------------------------|----------------------------------------------------------------------------------------------------------------------------------------------------------------------------------------------------------------------------------------------------------------------------------------------------------------------------------------------------------------------------------------------------------------------------------------------------------------------------------------------------------------------------------------------------------------------------------------------------------------------------------------------------------------------------------------------------------------------------------------------------|
| Journal:                           | <i>BMJ Open</i>                                                                                                                                                                                                                                                                                                                                                                                                                                                                                                                                                                                                                                                                                                                                    |
| Manuscript ID                      | bmjopen-2017-016192.R1                                                                                                                                                                                                                                                                                                                                                                                                                                                                                                                                                                                                                                                                                                                             |
| Article Type:                      | Research                                                                                                                                                                                                                                                                                                                                                                                                                                                                                                                                                                                                                                                                                                                                           |
| Date Submitted by the Author:      | 01-Apr-2017                                                                                                                                                                                                                                                                                                                                                                                                                                                                                                                                                                                                                                                                                                                                        |
| Complete List of Authors:          | Rossen, Janne; Sorlandet Hospital Kristiansand , Obstetric and Gynecology<br>Lucovnik, Miha; University Medical Center Ljubljana, Department of<br>Obstetrics and Gynecology, Division of Perinatology<br>Eggebø, Torbjørn; Stavanger University Hospital, Dept. of Obstetrics and<br>Gynecology<br>Tul, Natasa; University Medical Center Ljubljana, Department of Obstetrics<br>and Gynecology, Division of Perinatology<br>Murphy, Martina; National Maternity Hospital, University College Dublin,<br>Ireland. , Obstetrics and Gynecology<br>Vistad, Ingvild ; Sorlandet Hospital Kristiansand , Obstetric and Gynecology<br>Robson, Michael; National Maternity Hospital, University College Dublin,<br>Ireland. , Obstetrics and Gynecology |
| <b>Primary Subject<br>Heading</b>: | Obstetrics and gynaecology                                                                                                                                                                                                                                                                                                                                                                                                                                                                                                                                                                                                                                                                                                                         |
| Secondary Subject Heading:         | Epidemiology                                                                                                                                                                                                                                                                                                                                                                                                                                                                                                                                                                                                                                                                                                                                       |
| Keywords:                          | cesarean section, quality of care, the 10-Group Classification system, core<br>outcome, labor outcome, neonatal outcome                                                                                                                                                                                                                                                                                                                                                                                                                                                                                                                                                                                                                            |
|                                    |                                                                                                                                                                                                                                                                                                                                                                                                                                                                                                                                                                                                                                                                                                                                                    |

SCHOLARONE™  
Manuscripts



1  
2  
3 **A method to assess obstetric outcomes using the 10-Group Classification System: a**  
4  
5 **quantitative descriptive study**  
6  
7

8  
9  
10 Janne Rossen<sup>1,2</sup>, Miha Lucovnik<sup>3</sup>, Torbjørn Moe Eggebø<sup>2,4,5</sup>, Natasa Tul<sup>3</sup>, Martina Murphy<sup>6</sup>.

11  
12 Ingvild Vistad<sup>1</sup>, Michael Robson<sup>6</sup>  
13  
14

15  
16  
17  
18  
19  
20  
21  
22  
23  
24  
25  
26  
27 Corresponding author:

28  
29 Janne Rossen

30  
31 Department of Obstetrics and Gynecology, Sørlandet Sykehus, Kristiansand

32  
33 PB 416, 4604 Kristiansand

34  
35 Tel: +47 3807300

36  
37  
38 E-mail address: [janne.rossen@gmail.com](mailto:janne.rossen@gmail.com)  
39  
40  
41  
42  
43  
44  
45  
46  
47  
48  
49  
50  
51  
52  
53  
54  
55  
56  
57  
58  
59  
60

## ABSTRACT

**Objectives:** Internationally, the 10-Groups Classification System (TGCS) has been used to report cesarean section rates, but analysis of other outcomes are also recommended. We now aim to present the TGCS as a method to assess outcomes of labor and delivery using routine collection of perinatal information.

**Design:** A methodological study to describe the use of the TGCS

**Setting:** Stavanger University Hospital (SUH) Norway, National Maternity Hospital Dublin (NMH) Ireland and Slovenian National Perinatal Database (SLO) Slovenia

**Participants:** 9848 women from Stavanger University Hospital, Norway, 9250 women from National Maternity Hospital Dublin, Ireland and 106 167 women, from Slovenian National Perinatal Database, Slovenia

**Main outcome measures:** All women were classified according to the TGCS within which cesarean section, oxytocin augmentation, epidural analgesia, operative vaginal deliveries, episiotomy, sphincter rupture, postpartum hemorrhage, blood transfusion, maternal age >35 years, body mass index >30, Apgar score, umbilical cord pH, hypoxic ischemic encephalopathy, antepartum and perinatal deaths were incorporated.

**Results:** There were significant differences in the sizes of the groups of women and the incidences of events and outcomes within the TGCS between the three perinatal databases.

**Conclusions:** The TGCS is a standardized objective classification system where events and outcomes of labor and delivery can be incorporated. Obstetric core events and outcomes should be agreed and defined in order to set standards of care. This method provides continuous and available observations from delivery wards, possibly used for further interpretation, questions and international comparisons. The definition of quality may vary in different units and can only be ascertained when all the necessary information is available and considered together.

**Key words:**

Cesarean section, quality of care, labor outcome, neonatal outcome, the 10-Group Classification System, core outcome

**Abbreviations:**

SUH, Stavanger University Hospital; NMH, National Maternity Hospital; SLO, Slovenian National Perinatal Database; TGCS, the 10-Group Classification System; WHO, World Health Organization; FIGO, The International Federation of Gynecology and Obstetrics

**Strengths and limitations of this study:**

- This study proposes the use of an available method which may elaborate potential trends in delivery units and thus guide labor and delivery management
- Events and outcomes of labor are incorporated in the 10-Group Classification System from three different populations in Europe
- The 10-Group Classification System is limited by unclear definitions of some of the outcomes used and encourage the importance of an agreed set of obstetric core outcomes
- Comparing obstetric outcomes using the 10-Group Classification System do not adjust for risk factors
- The design as a quantitative descriptive study limits the ability to explore causes of the different prevalence's of outcomes and events observed

## INTRODUCTION

Safety, consistency and quality in labor and delivery are key priorities for all labor and delivery units. It is difficult to determine what quality in labor and delivery is, but attempts to develop important outcomes are taking place (1-4). An agreed classification system, incorporating key outcomes that are objective, measurable and relevant to clinical practice is required in order to assess consistency and quality of care.

Clinical practice and guidelines do vary internationally and occasionally also nationally. However, agreeing on a standard classification for assessment of quality of care should be less contentious. It is essential that providers and users of maternity care are aware of events and outcomes in their units and in addition having the ability to compare their results objectively over time and to other units. Only then can assessment of the quality of care take place (5, 6). The emphasis on evidence-based medicine should be supported by prospective databases combined with a multidisciplinary quality audit programme. Acceptance and commitment to this philosophy will provide insight about labor and delivery and importantly ensuring that we are providing safe and quality care (7).

The 10-Group Classification System (TGCS) was first described in 2001 and originally popularized as a method to assess cesarean section rates (8). The intention however, was to introduce a generic perinatal classification to assess all perinatal events and outcomes of which cesarean section is only one. The way the ten groups are structured make them relevant to all clinicians and women themselves and can provide a common language and starting point for any discussion on safety, quality of care and perinatal audit (9). The TGCS is endorsed by the World Health Organization (WHO) and the International Federation of Gynecology and Obstetrics (FIGO) and increasingly used by labor and delivery units to report their cesarean section rates (10-18). The WHO and FIGO also recommend that other events and outcomes surrounding labor and delivery are analyzed in relation to cesarean section using this classification.

This paper classifies data from three perinatal databases in different countries and explores the usefulness of the TGCS as a method to assess the quality of care. It also discusses the challenges that occur even using a standard classification system.

## METHODS

Data related to pregnancies and deliveries were prospectively collected in Stavanger University Hospital (SUH) Norway 2010-2011, National Maternity Hospital Dublin (NMH) Ireland 2011 and Slovenian National Perinatal Database (SLO) Slovenia 2007-2011. The study population included 9848 women in SUH, 9250 women in NMH and 106 167 women in SLO. All women were classified according to the TGCS (Figure 1). The NMH had a complete TGCS-registration initially. A complete registration was also confirmed at SUS and SLO after cross checking of data. Cesarean section was defined as after spontaneous onset, induction or pre-labor. Pre-pregnancy body mass index was calculated as weight in kilograms/height in meters squared. Episiotomies were either lateral or mediolateral and perineal tears affecting the external or the external and internal sphincter were classified as obstetric anal sphincter injuries. The attending midwife or obstetrician visually estimated blood loss and postpartum hemorrhage > 1000 millilitres were registered at SUH and NMH, and postpartum hemorrhage > 500 millilitres in SLO.

Perinatal deaths included all intrauterine deaths after 22 weeks gestational age and within the first week after delivery. Hypoxic ischemic encephalopathy was classified using the Sarnat or modified Sarnat definition as grade I (mild), grade II (moderate) and grade III (severe). All data are presented as descriptive statistic.

### Stavanger University Hospital

Stavanger University Hospital has a catchment population of approximately 320 000 and is the regional maternity unit in the west of Norway. It has a tradition of low obstetrical intervention rates. Women with one previous cesarean were encouraged to deliver vaginally. Information related to pregnancies and deliveries was prospectively collected and recorded in an electronic obstetrical journal system (Natus).

The Regional Committee for Medical and Health Research Ethics classified the study as a quality assurance study of routinely recorded data (REK Vest 2012/1522) and the local committee for data protection (2012/41) approved the project.

### National Maternity Hospital

The National Maternity Hospital is a tertiary referral maternity hospital in Dublin, Ireland and one of the largest labor and delivery units in Europe delivering over 9000 women a year. It is well known for its Active Management of Labor philosophy on labor (19). This package of care is based on the prevention of prolonged labor and the physical and emotional sequelae

1  
2  
3 that follow. Labor and delivery information is collected prospectively on an obstetrical and  
4 neonatal database. The hospital has traditionally for many years completed an Annual Clinical  
5 Report detailing each year's results.  
6  
7

### 8 9 10 **Slovenian National Database**

11 Slovenia is a European Union member state in Central Europe with approximately 2.1 million  
12 of inhabitants and 20 000 deliveries per year. Health care in Slovenia is a public service  
13 provided through the public health service network. Perinatal care is almost entirely covered  
14 by compulsory health insurance, which is publicly funded. Slovenia has had a National  
15 Perinatal Information System (NPIS) since 1987 and registration into a computerized database  
16 by the attending midwife and doctor is mandatory. Data from all 14 country's maternity unit  
17 are collected. To assure quality of data collection, controls are built in the computerized  
18 system and audited periodically.  
19  
20  
21  
22  
23  
24  
25

### 26 **RESULTS**

27 The populations contained 43%, 46% and 48% nulliparous women in SUH, NMH and SLO.  
28 The overall cesarean section rates were 13.6%, 21.4% and 17.4% in SUH, NMH and SLO,  
29 respectively. The highest rate of cesarean in groups 1 and 2a was observed in SLO. NMH  
30 presents the lowest rate of cesarean in group 3 and SUH the lowest rate in group 5. Rupture of  
31 the uterus was diagnosed in 0.02% (2/9848) women in SUH, no women in NMH and 0.04%  
32 (39/106 167) women in SLO during the study period. The relative sizes of the groups and  
33 cesarean section rates are presented in Table 1.  
34  
35  
36  
37  
38  
39

40 The overall pre-pregnant body mass index > 30 was 9.7%, 12.8%, 8.3% and the  
41 frequency of maternal age >35 years was 14.9%, 32.2%, 14.9% in SUH, NMH and SLO,  
42 respectively. Maternal characteristics stratified according to the TGCS are presented in Table  
43 2.  
44  
45

46 The overall use of epidural analgesia varied from 35.0% at SUH and 49.0% at NMH  
47 to 2.7% in SLO. The overall operative vaginal delivery rate varied from 12.7%, 11.9% and  
48 3.2% in SUH, NMH and SLO, respectively. The overall induction rates were 20.1%, 24.9%  
49 and 23.5% and the frequencies of use of oxytocin were 23.6%, 28.3% and 57.3% in SUH,  
50 NMH and SLO. The overall rates of episiotomy were 19.7%, 28.7% and 32.0% and the rates  
51 of obstetric anal sphincter injuries were 1.5%, 1.5% and 0.3% in SUH, NMH and SLO,  
52 respectively. The overall red cell blood transfusion rate was 2.7%, 1.4% and 0.2% in SUH,  
53  
54  
55  
56  
57  
58  
59  
60

1  
2  
3 NMH and SLO. Labor outcomes stratified according to the TGCS group's 1-5 are presented  
4 in Table 3 and 4.  
5

6 Overall perinatal death in SUH was 4.2 per 1000, in NMH 3.9 per 1000 and 5.0 per  
7 1000 (540/108070) in SLO. Perinatal deaths among groups 1 and 2 together were 1.3‰, 1.4‰  
8 and 1.2‰, among groups 3 and 4 together 0.1‰, 0.8‰ and 1.2‰ and among women with  
9 previous cesarean (group 5) 5.5‰, 0‰ and 0.9‰ in SUH, NMH and SLO, respectively.  
10

11 Neonatal outcomes stratified according to the TGCS 1-5 are presented in Table 5.  
12  
13

## 14 15 16 17 18 **DISCUSSION**

19 Every labor and delivery unit has a responsibility to record and publish their results. The  
20 results also need to be presented in a standardized and structured way, as the management and  
21 implications will vary in different groups of women. Any one event or outcome cannot be  
22 considered on their own without the understanding of any effects on other events, outcomes or  
23 complications. Care during labor and delivery has changed dramatically over the last 30 years  
24 (20). In particular, the cesarean section rate has risen and a common classification system  
25 might be helpful exploring benefits and risks associated to this intervention.  
26  
27  
28  
29  
30  
31

### 32 33 **Limitations**

34 Several challenges were discovered writing this manuscript. When comparing maternal, labor  
35 and perinatal outcomes between units and countries, objective variables (blood transfusion  
36 rates, perinatal deaths) have advantages over subjective assessed outcomes (postpartum  
37 hemorrhage, Apgar score <7 and hypoxic ischemic encephalopathy). In addition, some of our  
38 outcomes were differently defined and registered such as postpartum hemorrhage. This issue  
39 has been recognized and highlighted as a general problem in clinical trials (3, 4, 21).  
40

41 Standardizing and agreeing on which core outcomes to be used to assess quality would not  
42 only increase the usefulness of the information collected but also encourage delivery units to  
43 use the same definitions. Due to different databases and registration, we only succeeded in  
44 completing Table 1 with data from all the 10 groups. Ensuring quality data from national  
45 databases may be challenging and the low rates in SLO particularly of obstetric anal sphincter  
46 injuries and transfusion rates should have been validated. Even more important is the need for  
47 a structured and standardized collection and registration of defined core outcomes in delivery  
48 units and in national registers.  
49  
50  
51  
52  
53  
54  
55  
56  
57  
58  
59  
60

1  
2  
3 We present the use of the TGCS as a method of which possible patterns within the  
4 observed population may uncover. This does not include risk adjustment, which limits the  
5 ability to compare absolute percentages of the outcomes observed. However, by comparing  
6 outcomes and events between standardized groups of women, hypotheses requiring further  
7 attention might be suggested. To explore causality further studies are needed.  
8  
9  
10

### 11 12 13 **The 10-Group Classification System**

14 To achieve good data quality, proper registration and standardized definitions of outcomes are  
15 essential. The ability to classify all deliveries into one of the ten groups is however a quality  
16 indicator which many institutions, countries and perinatal databases struggle to do (5).  
17 Stressing this issue is important as the reliability of the data may affect the interpretation if the  
18 number of unclassified cases is significant. By presenting data using the TGCS, the ability to  
19 demonstrate significant differences in smaller units is limited. However, examining even a  
20 small number of cases may be helpful to develop local strategies to improve the quality of  
21 care (14). Risk is not only the chance of certain events occurring but also the implications if it  
22 did occur.  
23  
24  
25  
26  
27  
28

29 The TGCS presents a method of risk stratification, which visualizes how the cesarean  
30 section rate varies between different units and countries. Interpretation of other outcomes in  
31 the different groups may be used as a guidance to assess obstetric quality. Cesarean section  
32 rates can only be evaluated if perinatal and maternal outcomes are included (14, 22). Using  
33 the TGCS, there are only three possible explanations for differences in the sizes of the groups  
34 and the events and outcomes within the groups: data quality, significant differences in  
35 important epidemiological variables and differences in clinical practice (9).  
36  
37  
38  
39  
40

41 To improve management in labor and optimizing care, collection and simple  
42 interpretation of data are necessary (1). The data quality must be validated and by working  
43 together at multiple levels within the unit, improvements and adverse trends can be detected  
44 (2). The TGCS is shown to be consistent in size and the different cesarean section rates in the  
45 groups together with the size allow an informative interpretation of a given overall cesarean  
46 section rate (Table 1). When other epidemiological information, events, outcomes and  
47 processes are analyzed within the different groups as opposed to a proportion of the overall  
48 population, they increase in relevance. The TGCS do not adjust for risk factors, but by  
49 quantifying patient's populations and different practice patterns it allows a comparison of  
50 clinical value and may encourage a more in depth analysis of individual groups or sub-groups.  
51 Following are some examples of how our observations may be interpreted.  
52  
53  
54  
55  
56  
57  
58  
59  
60



1  
2  
3 Focusing on the management of both physical and emotional care of nulliparous  
4 women (group 1) is important as this will prevent the cesarean rate from a further increase  
5 when these women return for a future delivery (23, 24). SLO has an overall lower cesarean  
6 section rate than NMH, but a higher cesarean section rate of 10% in group 1 (Table 1). Table  
7 5 shows that lower cesarean section rates at SUH and NMH do not compromise good  
8 perinatal outcome.  
9  
10

11  
12 A greater than a 2:1 ratio of the size of groups 1 and 2 reflects a low intervention rate  
13 in term single cephalic nulliparous women (5). This is influenced by culture, obstetric practice  
14 and case mix of the particular population. The ratios in our populations were 3.1, 1.7, and 3.3,  
15 SUH, NMH, SLO, respectively. The definition of pre-labor cesarean will additionally define  
16 in which group the women are classified (group 1 or group 2b) with an impact of this ratio.  
17 Clearly, the benefits of labor induction must be weighed against the potential maternal and  
18 fetal risks associated with the procedure, as well as knowledge of the population and the  
19 incidence of antenatal stillbirths (23, 25). Maternity care before and in relation to the  
20 management of labor will further influence to which group and following risk the woman  
21 belongs to in her next pregnancy (group 3, 4 or 5) (10). The rate of cesarean section in the  
22 subsequent pregnancy was 5.3%, 3.8%, 5.1% (SUH, NMH, SLO respectively) in women  
23 without a previous cesarean (group 3 and 4 combined) compared to 46.0%, 60.5%, 74.7%  
24 (SUH, NMH SLO respectively) in women with a previous cesarean (group 5).  
25  
26  
27  
28  
29  
30  
31  
32  
33  
34

35 As presented in Table 2, the women delivering at NMH were in all groups older than  
36 the women delivering at SUH and in SLO. When comparing cesarean section rates (Table 1),  
37 the low rate at NMH in group 1 might reflect a certain type of labor management as high  
38 maternal age is normally associated with an increased incidence of interventions.  
39  
40

41 SUH has the lowest overall cesarean section rate and the lowest overall use of  
42 oxytocin. However, stratified by the TGCS, the use of oxytocin at SUH was lowest in group 1  
43 only. SUH practice a judicious use of oxytocin that includes a definition of the start of active  
44 labor, prolonged labor and thereby indication for oxytocin use, which differ from NMH and  
45 SLO (26). Compared to NMH and their philosophy of prevention of prolonged labor this may  
46 lead to more labors that are prolonged. The package of Active Management of Labor with one  
47 to one care and its advantages practiced at NMH and in SLO, has always been an issue of  
48 much debate (27). The role of oxytocin in labor management is important, but the optimal  
49 dose and timing is yet to be revealed (26). The different types of labor management probably  
50 explain the different rates of oxytocin augmentation and prolonged labors observed (Table 3  
51 and 4).  
52  
53  
54  
55  
56  
57  
58  
59  
60

1  
2  
3 Furthermore, by using the TGCS, a higher rate of obstetric anal sphincter injuries  
4 among women in group 2a and 5 at SUH is evident which deserves closer investigation. The  
5 overall rate of severe postpartum hemorrhage at SUH, is relatively at least, high and in  
6 addition proportionally higher than the transfusion rates (28). This highlights the importance  
7 of analyzing both subjective (estimated blood loss) outcomes together with objective  
8 (transfusion rates) when evaluating obstetric practice (21, 29).  
9  
10

11  
12 Compared to SUH and NMH, the operative vaginal delivery rate is lower in SLO. The  
13 risk of adverse maternal and neonatal outcomes increases with an operative vaginal delivery  
14 but if the alternative is a cesarean at full dilatation, the risk benefit ratio must be carefully  
15 considered (30). Occurrence of maternal and neonatal complications is, however, similar to  
16 SUH and NMH with the exception of lower sphincter rupture rates in all groups.  
17  
18  
19  
20  
21  
22

### 23 **Conclusion**

24 We present cesarean section rates, maternal characteristics together with labor and fetal  
25 outcomes using the TGCS as a starting point. This is a systematic method of assessing the  
26 events and outcomes, which may contribute to the judgment of quality of care in labor and  
27 delivery. We encourage other labor and delivery wards to make use of the same classification  
28 and then by working together and sharing our knowledge we can learn from each other. The  
29 first step in providing quality of care is to be aware of your results.  
30  
31  
32  
33  
34  
35  
36  
37

### 38 **Authors affiliations:**

39 <sup>1</sup> Department of Obstetrics and Gynecology, Sørlandet Hospital HF Kristiansand, Norway,

40  
41 <sup>2</sup>Department of Laboratory Medicine, Children's and Women's Health, Norwegian University  
42 of Science and Technology, Trondheim, Norway,

43  
44 <sup>3</sup> Department of Perinatology, Division of Obstetrics and Gynecology, University Medical  
45 Center Ljubljana, Slovenia,

46  
47 <sup>4</sup> Department of Obstetrics and Gynecology, Stavanger University Hospital, Norway, <sup>5</sup>  
48 National Center for Fetal Medicine, Trondheim University Hospital, St Olavs Hospital,  
49 Trondheim, Norway,

50  
51  
52 <sup>6</sup> National Maternity Hospital, Dublin, Ireland  
53  
54  
55  
56  
57  
58  
59  
60

**Contributors:** JR, ML, TME and MR have contributed to the idea and design of the study. JR, ML, NT, MM and TME have contributed to the preparation of the data used. JR, TME, IV and MR have assisted the literature research and editing of the manuscript. All authors have read and approved the final manuscript.

**Funding:** The authors have no financial and material support to report.

**Conflicts of interest notification:** Michael Robson developed the 10-Group classification system. The authors have no conflicts of interest.

**Data sharing statement:** There are no additional data available.

1. Sibanda T, Fox R, Draycott TJ, Mahmood T, Richmond D, Simms RA. Intrapartum care quality indicators: a systematic approach for achieving consensus. *Eur J Obstet Gynecol Reprod Biol.* 2013;166(1):23-9.
2. Sprague AE, Dunn SI, Fell DB, Harrold J, Walker MC, Kelly S, et al. Measuring quality in maternal-newborn care: developing a clinical dashboard. *J Obstet Gynaecol Can.* 2013;35(1):29-38.
3. Khan K, Chief Editors of Journals participating in The CI. The CROWN Initiative: journal editors invite researchers to develop core outcomes in women's health. *BJOG.* 2016;123 Suppl 3:103-4.
4. Geirsson RT, Eggebo T. Core outcomes for reporting women's health. *Acta Obstet Gynecol Scand.* 2014;93(9):843-4.
5. Robson M, Hartigan L, Murphy M. Methods of achieving and maintaining an appropriate caesarean section rate. *Best Pract Res Clin Obstet Gynaecol.* 2013;27:297-308.
6. Gee RE, Winkler R. Quality measurement: what it means for obstetricians and gynecologists. *Obstet Gynecol.* 2013;121(3):507-10.
7. Lawrence HC, 3rd, Copel JA, O'Keefe DF, Bradford WC, Scarrow PK, Kennedy HP, et al. Quality patient care in labor and delivery: a call to action. *Am J Obstet Gynecol.* 2012;207(3):147-8.
8. Robson MS. Classification of caesarean sections. *Fetal Matern Med Rev.* 2001;Vol.12(1):23-39.
9. Robson M. The Ten Group Classification System (TGCS) - a common starting point for more detailed analysis. *BJOG.* 2015;122(5):701.
10. Brennan DJ, Robson MS, Murphy M, O'Herlihy C. Comparative analysis of international cesarean delivery rates using 10-group classification identifies significant variation in spontaneous labor. *American Journal of Obstetrics and Gynecology.* 2009;201(3):308 e1-8.
11. Fischer A, LaCoursiere DY, Barnard P, Bloebaum L, Varner M. Differences between hospitals in cesarean rates for term primigravidas with cephalic presentation. *Obstet Gynecol.* 2005;105(4):816-21.
12. Scarella A, Chamy V, Sepulveda M, Belizan JM. Medical audit using the Ten Group Classification System and its impact on the cesarean section rate. *European*

- Journal of Obstetrics, Gynecology, and Reproductive Biology. 2011;154(2):136-40.
13. Ciriello E, Locatelli A, Incerti M, Ghidini A, Andreani M, Plevani C, et al. Comparative analysis of cesarean delivery rates over a 10-year period in a single Institution using 10-class classification. *J Matern Fetal Neonatal Med.* 2012;25(12):2717-20.
  14. Homer CS, Kurinczuk JJ, Spark P, Brocklehurst P, Knight M. A novel use of a classification system to audit severe maternal morbidity. *Midwifery.* 2010;26(5):532-6.
  15. Betran AP, Torloni MR, Zhang JJ, Gulmezoglu AM, Section WHOWGoC. WHO Statement on Caesarean Section Rates. *BJOG.* 2016;123(5):667-70.
  16. Figo Working Group On Challenges In Care Of M, Infants During L, Delivery. Best practice advice on the 10-Group Classification System for cesarean deliveries. *Int J Gynaecol Obstet.* 2016;135(2):232-3.
  17. Chong C, Su LL, Biswas A. Changing trends of cesarean section births by the Robson Ten Group Classification in a tertiary teaching hospital. *Acta Obstet Gynecol Scand.* 2012;91(12):1422-7.
  18. Minsart AF, De Spiegelaere M, Englert Y, Buekens P. Classification of cesarean sections among immigrants in Belgium. *Acta Obstet Gynecol Scand.* 2013;92(2):204-9.
  19. O'Driscoll K, Foley M, MacDonald D. Active management of labor as an alternative to cesarean section for dystocia. *Obstetrics and Gynecology.* 1984;63(4):485-90.
  20. Laughon SK, Branch DW, Beaver J, Zhang J. Changes in labor patterns over 50 years. *Am J Obstet Gynecol.* 2012;206(5):419 e1-9.
  21. Rath WH. Postpartum hemorrhage--update on problems of definitions and diagnosis. *Acta Obstet Gynecol Scand.* 2011;90(5):421-8.
  22. Nippita TA, Lee YY, Patterson JA, Ford JB, Morris JM, Nicholl MC, et al. Variation in hospital caesarean section rates and obstetric outcomes among nulliparae at term: a population-based cohort study. *BJOG.* 2015;122(5):702-11.
  23. Brennan DJ, Murphy M, Robson MS, O'Herlihy C. The singleton, cephalic, nulliparous woman after 36 weeks of gestation: contribution to overall cesarean delivery rates. *Obstet Gynecol.* 2011;117(2 Pt 1):273-9.
  24. Barber EL, Lundsberg LS, Belanger K, Pettker CM, Funai EF, Illuzzi JL. Indications contributing to the increasing cesarean delivery rate. *Obstet Gynecol.* 2011;118(1):29-38.
  25. ACOG Practice Bulletin No. 107: Induction of labor. *Obstetrics and gynecology.* 2009;Aug;114(2 Pt 1):386-97.
  26. Rossen J, Ostborg TB, Lindtjorn E, Schulz J, Eggebo TM. Judicious use of oxytocin augmentation for the management of prolonged labor. *Acta Obstet Gynecol Scand.* 2016;95(3):355-61.
  27. Brown HC, Paranjothy S, Dowswell T, Thomas J. Package of care for active management in labour for reducing caesarean section rates in low-risk women. *Cochrane Database Syst Rev.* 2013;9:CD004907.
  28. Mousa HA, Alfirevic Z. Treatment for primary postpartum haemorrhage. *Cochrane Database Syst Rev.* 2007(1):CD003249.
  29. Woiski MD, Scheepers HC, Liefers J, Lance M, Middeldorp JM, Lotgering FK, et al. Guideline-based development of quality indicators for prevention and management of postpartum hemorrhage. *Acta Obstet Gynecol Scand.* 2015;94(10):1118-27.

- 1  
2  
3 30. Walsh CA, Robson M, McAuliffe FM. Mode of delivery at term and adverse  
4 neonatal outcomes. *Obstet Gynecol.* 2013;121(1):122-8.  
5  
6  
7  
8  
9  
10  
11  
12  
13  
14  
15  
16  
17  
18  
19  
20  
21

22 **Legends:**  
23

24  
25  
26 Table 1 The 10-Group Classification System for Stavanger University Hospital, Norway,  
27 National Maternity Hospital Dublin, Ireland, Slovenian National Perinatal Database, Slovenia  
28 2007-2011  
29

30  
31 Table 2 Maternal characteristics stratified in the 10-Group Classification System groups 1-5  
32

33  
34 Table 3 Labor outcomes stratified in the 10-Group Classification System groups 1-5  
35

36  
37 Table 4 Labor outcomes stratified in the 10-Group Classification System groups 1-5  
38

39  
40 Table 5 Neonatal outcomes stratified in the 10-Group Classification System groups 1-5  
41  
42

43  
44 Figure 1 The 10-Group Classification System  
45  
46  
47  
48  
49  
50  
51  
52  
53  
54  
55  
56  
57  
58  
59  
60

Table 1 The 10-Group Classification System for Stavanger University Hospital, Norway, National Maternity Hospital Dublin, Ireland, Slovenian National Perinatal Database, Slovenia 2007-2011

|          | Relative size of the group (%) |      |      | CD rate in each group (%) |                    |                       | Contribution made to overall CD rate (%) |                        |                        |
|----------|--------------------------------|------|------|---------------------------|--------------------|-----------------------|------------------------------------------|------------------------|------------------------|
|          | SUH                            | NMH  | SLO  | SUH<br>(340/9848)         | NMH<br>(1980/9250) | SLO<br>(18454/106167) | SUH<br>CD rate<br>13.6                   | NMH<br>CD rate<br>21.4 | SLO<br>CD rate<br>17.4 |
| Overall  |                                |      |      |                           |                    |                       |                                          |                        |                        |
| Group 1  | 28.9                           | 25.8 | 33.2 | 6.5                       | 7.4                | 10.0                  | 1.9                                      | 1.9                    | 3.3                    |
| Group 2  | 9.3                            | 14.8 | 10.1 | 25.7                      | 34.9               | 30.4                  | 2.4                                      | 5.3                    | 3.1                    |
| Group 2a | 8.6                            | 13.8 | 9.1  | 19.6                      | 30.2               | 23.0                  | 1.7                                      | 4.2                    | 2.1                    |
| Group 2b | 0.5                            | 1.0  | 1.0  | 100.0                     | 100.0              | 100.0                 | 0.5                                      | 1.0                    | 1.0                    |
| Group 3  | 37.9                           | 29.8 | 32.3 | 1.7                       | 1.1                | 2.4                   | 0.6                                      | 0.3                    | 0.8                    |
| Group 4  | 9.7                            | 9.4  | 8.8  | 19.5                      | 12.7               | 14.9                  | 1.9                                      | 1.2                    | 1.3                    |
| Group 4a | 8.4                            | 8.7  | 7.9  | 6.4                       | 5.8                | 4.2                   | 0.5                                      | 0.5                    | 0.3                    |
| Group 4b | 1.3                            | 0.7  | 1.0  | 100.0                     | 100.0              | 100.0                 | 1.3                                      | 0.7                    | 1.0                    |
| Group 5  | 5.5                            | 10.2 | 4.8  | 46.0                      | 60.9               | 74.7                  | 2.5                                      | 6.2                    | 3.6                    |
| Group 6  | 1.8                            | 2.4  | 2.3  | 79.4                      | 93.2               | 82.6                  | 1.5                                      | 2.2                    | 1.9                    |
| Group 7  | 1.0                            | 1.4  | 1.1  | 66.7                      | 85.0               | 71.7                  | 0.6                                      | 1.2                    | 0.8                    |
| Group 8  | 1.7                            | 2.2  | 1.8  | 40.8                      | 64.9               | 54.2                  | 0.7                                      | 1.4                    | 1.0                    |
| Group 9  | 0.2                            | 0.4  | 0.6  | 100.0                     | 100                | 92.8                  | 0.2                                      | 0.4                    | 0.6                    |
| Group 10 | 4.0                            | 3.7  | 4.9  | 31.9                      | 37.6               | 22.1                  | 1.3                                      | 1.4                    | 1.1                    |

SUH, Stavanger University Hospital 2010-2011; NMH, National Maternity Hospital 2011; SLO, Slovenian National Perinatal Database 2007-2011

Table 2: Maternal characteristics stratified in the 10-Group Classification System groups 1-5

|          | Body mass index > 30 |      |      | Maternal age > 35 years |      |      |
|----------|----------------------|------|------|-------------------------|------|------|
|          | %                    |      |      | %                       |      |      |
|          | SUH                  | NMH  | SLO  | SUH                     | NMH  | SLO  |
| Group 1  | 5.3                  | 8.1  | 5.1  | 5.2                     | 16.7 | 6.3  |
| Group 2a | 10.3                 | 12.7 | 11.0 | 10.7                    | 25.4 | 8.1  |
| Group 2b | 9.8                  | 11.2 | 11.6 | 21.7                    | 46.7 | 23.4 |
| Group 3  | 6.1                  | 11.4 | 8.2  | 18.5                    | 37.3 | 20.5 |
| Group 4a | 12.6                 | 16.1 | 14.9 | 23.0                    | 45.9 | 23.7 |
| Group 4b | 16.7                 | 14.3 | 16.6 | 32.8                    | 57.1 | 27.8 |
| Group 5  | 11.6                 | 19.1 | 14.8 | 26.7                    | 46.2 | 23.8 |

SUH, Stavanger University Hospital 2010-2011; NMH, National Maternity Hospital 2011; SLO, Slovenian National Perinatal Database 2007-2011

Table 3 Labor outcomes stratified in the 10-Group Classification System groups 1-5

|          | Episiotomy |      |      | Obstetric anal sphincter injuries |     |     | Duration of labor > 12 hours |     |     | Operative vaginal delivery |      |     |
|----------|------------|------|------|-----------------------------------|-----|-----|------------------------------|-----|-----|----------------------------|------|-----|
|          | %          |      |      | %                                 |     |     | %                            |     |     | %                          |      |     |
|          | SUH        | NMH  | SLO  | SUH                               | NMH | SLO | SUH                          | NMH | SLO | SUH                        | NMH  | SLO |
| Group 1  | 35.8       | 56.8 | 50.9 | 2.4                               | 2.5 | 0.4 | 11.3                         | 2.8 | 1.2 | 23.7                       | 24.6 | 5.9 |
| Group 2a | 40.6       | 46.1 | 45.8 | 3.7                               | 2.2 | 0.4 | 9.9                          | 5.8 | 1.6 | 31.9                       | 23.4 | 7.2 |
| Group 2b | -          | -    | -    | -                                 | -   | -   | -                            | -   | -   | -                          | -    | -   |
| Group 3  | 7.3        | 8.8  | 20.4 | 0.6                               | 1.0 | 0.2 | 2.5                          | 0.2 | 0.1 | 3.5                        | 2.5  | 0.7 |
| Group 4a | 11.8       | 12.2 | 21.8 | 0.6                               | 0.6 | 0.2 | 3.4                          | 0.4 | 0.2 | 6.7                        | 4.9  | 1.3 |
| Group 4b | -          | -    | -    | -                                 | -   | -   | -                            | -   | -   | -                          | -    | -   |
| Group 5  | 17.9       | 18.7 | 12.1 | 2.4                               | 0.6 | 0.1 | 10.1                         | 0.1 | 0.2 | 13.8                       | 8.3  | 1.7 |

SUH, Stavanger University Hospital 2010-2011; NMH, National Maternity Hospital 2011; SLO, Slovenian National Perinatal Database 2007-2011

-, not applicable



Table 4 Labor outcomes stratified in the 10-Groups Classification System groups 1-5

|          | Acceleration with Oxytocin<br>% |      |      | Epidural in labor<br>% |      |     | Postpartum hemorrhage<br>> 1000 milliliters<br>% |     |     | Transfusions<br>% |     |     |
|----------|---------------------------------|------|------|------------------------|------|-----|--------------------------------------------------|-----|-----|-------------------|-----|-----|
|          | SUH                             | NMH  | SLO  | SUH                    | NMH  | SLO | SUH                                              | NMH | SLO | SUH               | NMH | SLO |
| Group 1  | 33.2                            | 53.2 | 69.1 | 43.7                   | 73.7 | 4.2 | 4.5                                              | 1.0 | x   | 2.6               | 1.5 | 0.2 |
| Group 2a | 68.3                            | 69.0 | 79.4 | 71.8                   | 76.1 | 5.3 | 9.9                                              | 3.1 | x   | 2.2               | 3.1 | 0.2 |
| Group 2b | -                               | -    | -    | -                      | -    | -   | 17.6                                             | 1.1 | x   | 2.0               | x   | 0.4 |
| Group 3  | 6.7                             | 4.0  | 43.5 | 19.2                   | 34.9 | 1.2 | 2.5                                              | 0.5 | x   | 2.8               | 0.7 | 0.1 |
| Group 4a | 46.9                            | 25.0 | 68.5 | 44.7                   | 48.2 | 2.6 | 4.1                                              | 1.1 | x   | 3.0               | 1.0 | 0.3 |
| Group 4b | -                               | -    | -    | -                      | -    | -   | 5.6                                              | 4.8 | x   | 1.6               | x   | 0.6 |
| Group 5  | 12.7                            | 9.0  | 23.0 | 39.8                   | 31.7 | 1.5 | 5.7                                              | 1.6 | x   | 1.8               | 2.0 | 0.2 |

SUH, Stavanger University Hospital 2010-2011; NMH, National Maternity Hospital 2011; SLO, Slovenian National Perinatal Database 2007-2011

-; not applicable

X; missing data

Table 5 Neonatal outcomes stratified in the 10-Group Classification System groups 1-5

1  
2  
3  
4  
5  
6  
7  
8  
9  
10  
11  
12  
13  
14  
15  
16  
17  
18  
19  
20  
21  
22  
23  
24  
25  
26  
27  
28  
29  
30  
31  
32  
33  
34  
35  
36  
37  
38  
39  
40  
41  
42  
43  
44  
45  
46  
47  
48  
49  
50  
51  
52  
53  
54  
55  
56  
57  
58  
59  
60

|          | Apgar score <7 |     |     | Umbilical cord |     |     | Antepartum |     |     | Hypoxic-ischemic |     |     | Perinatal |     |     |
|----------|----------------|-----|-----|----------------|-----|-----|------------|-----|-----|------------------|-----|-----|-----------|-----|-----|
|          | at 5 min       |     |     | pH<7.0         |     |     | death      |     |     | encephalopathy   |     |     | death     |     |     |
|          | %              |     |     | %              |     |     | ‰          |     |     | ‰                |     |     | ‰         |     |     |
|          | SUH            | NMH | SLO | SUH            | NMH | SLO | SUH        | NMH | SLO | SUH              | NMH | SLO | SUH       | NMH | SLO |
| Group 1  | 0.9            | 1.1 | 0.4 | 0.6            | 0.5 | x   | 0.7        | 0   | 0.5 | 1.1              | 3.4 | 0.8 | 1.1       | 0   | 0.7 |
| Group 2a | 2.5            | 1.6 | 0.8 | 0.5            | 0.3 | x   | 2.4        | 3.1 | 3.0 | 1.1              | 4.3 | 1.4 | 2.4       | 3.9 | 3.2 |
| Group 2b | 0              | x   | 0.7 | 0              | x   | x   | 0          | 0   | 0.9 | 0                | 0.1 | 1.6 | 0         | 0   | 1.9 |
| Group 3  | 0.4            | 0.3 | 0.1 | 0.2            | 0   | x   | 0.5        | 0.4 | 0.5 | 0.5              | 0.4 | 0.3 | 0.5       | 0.4 | 0.6 |
| Group 4a | 0.2            | 0.9 | 0.3 | 0.4            | 0.9 | x   | 2.4        | 1.2 | 3.6 | 0                | 0   | 0.5 | 2.4       | 2.3 | 3.9 |
| Group 4b | 0              | x   | 0.8 | 0              | x   | x   | 7.5        | 0   | 1.0 | 0                | 0.3 | 0.7 | 7.5       | 0   | 0.1 |
| Group 5  | 1.3            | 0.2 | 0.6 | 0              | 0.4 | x   | 5.5        | 0   | 0.8 | 1.8              | 0   | 0.6 | 5.5       | 0   | 1.0 |

SUH, Stavanger University Hospital 2010-2011; NMH, National Maternity Hospital 2011; SLO, Slovenian National Perinatal Database 2007-2011

x; missing data

| Group | Description                                                                                         |
|-------|-----------------------------------------------------------------------------------------------------|
| 1     | Nulliparous, single cephalic, $\geq 37$ weeks, spontaneous labor                                    |
| 2a    | Nulliparous, single cephalic, $\geq 37$ weeks, induced labor                                        |
| 2b    | Nulliparous, single cephalic, $\geq 37$ weeks, cesarean before labor                                |
| 3     | Multiparous (excluding previous cesareans), single cephalic, $\geq 37$ weeks, spontaneous labor     |
| 4a    | Multiparous (excluding previous cesareans), single cephalic, $\geq 37$ weeks, induced labor         |
| 4b    | Multiparous (excluding previous cesareans), single cephalic, $\geq 37$ weeks, cesarean before labor |
| 5     | Previous cesarean, single cephalic $\geq 37$ weeks                                                  |
| 6     | All nulliparous breeches                                                                            |
| 7     | All multiparous breeches (including previous cesareans)                                             |
| 8     | All multiple pregnancies (including previous cesareans)                                             |
| 9     | All abnormal lies (including previous cesareans)                                                    |
| 10    | All single cephalic, $\leq 36$ weeks (including previous cesareans)                                 |

Figure 1 The 10-Group Classification system

**STROBE 2007 (v4) checklist of items to be included in reports of observational studies in epidemiology\***  
**Checklist for cohort, case-control, and cross-sectional studies (combined)**

| Section/Topic             | Item # | Recommendation                                                                                                                                                                                                                                                                                                                                                                                                                                                         | Reported on page # |
|---------------------------|--------|------------------------------------------------------------------------------------------------------------------------------------------------------------------------------------------------------------------------------------------------------------------------------------------------------------------------------------------------------------------------------------------------------------------------------------------------------------------------|--------------------|
| Title and abstract        | 1      | (a) Indicate the study's design with a commonly used term in the title or the abstract                                                                                                                                                                                                                                                                                                                                                                                 | 1 and 2            |
|                           |        | (b) Provide in the abstract an informative and balanced summary of what was done and what was found                                                                                                                                                                                                                                                                                                                                                                    | 2                  |
| <b>Introduction</b>       |        |                                                                                                                                                                                                                                                                                                                                                                                                                                                                        |                    |
| Background/rationale      | 2      | Explain the scientific background and rationale for the investigation being reported                                                                                                                                                                                                                                                                                                                                                                                   | 4                  |
| Objectives                | 3      | State specific objectives, including any pre-specified hypotheses                                                                                                                                                                                                                                                                                                                                                                                                      | 4                  |
| <b>Methods</b>            |        |                                                                                                                                                                                                                                                                                                                                                                                                                                                                        |                    |
| Study design              | 4      | Present key elements of study design early in the paper                                                                                                                                                                                                                                                                                                                                                                                                                | 4, introduction    |
| Setting                   | 5      | Describe the setting, locations, and relevant dates, including periods of recruitment, exposure, follow-up, and data collection                                                                                                                                                                                                                                                                                                                                        | 5 and 6            |
| Participants              | 6      | (a) <i>Cohort study</i> —Give the eligibility criteria, and the sources and methods of selection of participants. Describe methods of follow-up<br><i>Case-control study</i> —Give the eligibility criteria, and the sources and methods of case ascertainment and control selection. Give the rationale for the choice of cases and controls<br><i>Cross-sectional study</i> —Give the eligibility criteria, and the sources and methods of selection of participants | 5 and 6            |
|                           |        | (b) <i>Cohort study</i> —For matched studies, give matching criteria and number of exposed and unexposed<br><i>Case-control study</i> —For matched studies, give matching criteria and the number of controls per case                                                                                                                                                                                                                                                 | Not applicable     |
| Variables                 | 7      | Clearly define all outcomes, exposures, predictors, potential confounders, and effect modifiers. Give diagnostic criteria, if applicable                                                                                                                                                                                                                                                                                                                               | 5                  |
| Data sources/ measurement | 8*     | For each variable of interest, give sources of data and details of methods of assessment (measurement). Describe comparability of assessment methods if there is more than one group                                                                                                                                                                                                                                                                                   | Not applicable     |
| Bias                      | 9      | Describe any efforts to address potential sources of bias                                                                                                                                                                                                                                                                                                                                                                                                              | 5 and 6            |
| Study size                | 10     | Explain how the study size was arrived at                                                                                                                                                                                                                                                                                                                                                                                                                              | 5                  |
| Quantitative variables    | 11     | Explain how quantitative variables were handled in the analyses. If applicable, describe which groupings were chosen and why                                                                                                                                                                                                                                                                                                                                           | 5                  |
| Statistical methods       | 12     | (a) Describe all statistical methods, including those used to control for confounding                                                                                                                                                                                                                                                                                                                                                                                  | Not applicable     |
|                           |        | (b) Describe any methods used to examine subgroups and interactions                                                                                                                                                                                                                                                                                                                                                                                                    | Not applicable     |
|                           |        | (c) Explain how missing data were addressed                                                                                                                                                                                                                                                                                                                                                                                                                            | Excluded           |
|                           |        | (d) <i>Cohort study</i> —If applicable, explain how loss to follow-up was addressed<br><i>Case-control study</i> —If applicable, explain how matching of cases and controls was addressed                                                                                                                                                                                                                                                                              | Nor applicable     |

|                   |     |                                                                                                                                                                                                              |                                                                                                                        |
|-------------------|-----|--------------------------------------------------------------------------------------------------------------------------------------------------------------------------------------------------------------|------------------------------------------------------------------------------------------------------------------------|
|                   |     | <i>Cross-sectional study</i> —If applicable, describe analytical methods taking account of sampling strategy                                                                                                 |                                                                                                                        |
|                   |     | (e) Describe any sensitivity analyses                                                                                                                                                                        | Not applicable                                                                                                         |
| <b>Results</b>    |     |                                                                                                                                                                                                              |                                                                                                                        |
| Participants      | 13* | (a) Report numbers of individuals at each stage of study—eg numbers potentially eligible, examined for eligibility, confirmed eligible, included in the study, completing follow-up, and analysed            | 5 and Table 1                                                                                                          |
|                   |     | (b) Give reasons for non-participation at each stage                                                                                                                                                         | Not applicable                                                                                                         |
|                   |     | (c) Consider use of a flow diagram                                                                                                                                                                           | Not applicable                                                                                                         |
| Descriptive data  | 14* | (a) Give characteristics of study participants (eg demographic, clinical, social) and information on exposures and potential confounders                                                                     | Table 1 and 2                                                                                                          |
|                   |     | (b) Indicate number of participants with missing data for each variable of interest                                                                                                                          | Table 1                                                                                                                |
|                   |     | (c) <i>Cohort study</i> —Summarise follow-up time (eg, average and total amount)                                                                                                                             | 5 (MM)                                                                                                                 |
| Outcome data      | 15* | <i>Cohort study</i> —Report numbers of outcome events or summary measures over time                                                                                                                          |                                                                                                                        |
|                   |     | <i>Case-control study</i> —Report numbers in each exposure category, or summary measures of exposure                                                                                                         |                                                                                                                        |
|                   |     | <i>Cross-sectional study</i> —Report numbers of outcome events or summary measures                                                                                                                           | Table 3,4 and 5                                                                                                        |
| Main results      | 16  | (a) Give unadjusted estimates and, if applicable, confounder-adjusted estimates and their precision (eg, 95% confidence interval). Make clear which confounders were adjusted for and why they were included | Table 1-5. Confidence intervals can be calculated, but are not included                                                |
|                   |     | (b) Report category boundaries when continuous variables were categorized                                                                                                                                    | Not applicable                                                                                                         |
|                   |     | (c) If relevant, consider translating estimates of relative risk into absolute risk for a meaningful time period                                                                                             | Not applicable                                                                                                         |
| Other analyses    | 17  | Report other analyses done—eg analyses of subgroups and interactions, and sensitivity analyses                                                                                                               |                                                                                                                        |
| <b>Discussion</b> |     |                                                                                                                                                                                                              |                                                                                                                        |
| Key results       | 18  | Summarise key results with reference to study objectives                                                                                                                                                     | 8                                                                                                                      |
| Limitations       | 19  | Discuss limitations of the study, taking into account sources of potential bias or imprecision. Discuss both direction and magnitude of any potential bias                                                   | 7 and 8                                                                                                                |
| Interpretation    | 20  | Give a cautious overall interpretation of results considering objectives, limitations, multiplicity of analyses, results from similar studies, and other relevant evidence                                   | This method of the expanded use of TGCS is earlier not presented. Limitations (page 7 and 8) and interpretations (page |

|                          |    |                                                                                                                                                               |                            |
|--------------------------|----|---------------------------------------------------------------------------------------------------------------------------------------------------------------|----------------------------|
|                          |    |                                                                                                                                                               | 8-10) are being discussed. |
| Generalisability         | 21 | Discuss the generalisability (external validity) of the study results                                                                                         | 8 and 10 (conclusion)      |
| <b>Other information</b> |    |                                                                                                                                                               |                            |
| Funding                  | 22 | Give the source of funding and the role of the funders for the present study and, if applicable, for the original study on which the present article is based | 11 (not applicable)        |

\*Give information separately for cases and controls in case-control studies and, if applicable, for exposed and unexposed groups in cohort and cross-sectional studies.

**Note:** An Explanation and Elaboration article discusses each checklist item and gives methodological background and published examples of transparent reporting. The STROBE checklist is best used in conjunction with this article (freely available on the Web sites of PLoS Medicine at <http://www.plosmedicine.org/>, Annals of Internal Medicine at <http://www.annals.org/>, and Epidemiology at <http://www.epidem.com/>). Information on the STROBE Initiative is available at [www.strobe-statement.org](http://www.strobe-statement.org).

# BMJ Open

## A method to assess obstetric outcomes using the 10-Group Classification System: a quantitative descriptive study

|                                    |                                                                                                                                                                                                                                                                                                                                                                                                                                                                                                                                                                                                                                                                                                                                                    |
|------------------------------------|----------------------------------------------------------------------------------------------------------------------------------------------------------------------------------------------------------------------------------------------------------------------------------------------------------------------------------------------------------------------------------------------------------------------------------------------------------------------------------------------------------------------------------------------------------------------------------------------------------------------------------------------------------------------------------------------------------------------------------------------------|
| Journal:                           | <i>BMJ Open</i>                                                                                                                                                                                                                                                                                                                                                                                                                                                                                                                                                                                                                                                                                                                                    |
| Manuscript ID                      | bmjopen-2017-016192.R2                                                                                                                                                                                                                                                                                                                                                                                                                                                                                                                                                                                                                                                                                                                             |
| Article Type:                      | Research                                                                                                                                                                                                                                                                                                                                                                                                                                                                                                                                                                                                                                                                                                                                           |
| Date Submitted by the Author:      | 26-Apr-2017                                                                                                                                                                                                                                                                                                                                                                                                                                                                                                                                                                                                                                                                                                                                        |
| Complete List of Authors:          | Rossen, Janne; Sorlandet Hospital Kristiansand , Obstetric and Gynecology<br>Lucovnik, Miha; University Medical Center Ljubljana, Department of<br>Obstetrics and Gynecology, Division of Perinatology<br>Eggebø, Torbjørn; Stavanger University Hospital, Dept. of Obstetrics and<br>Gynecology<br>Tul, Natasa; University Medical Center Ljubljana, Department of Obstetrics<br>and Gynecology, Division of Perinatology<br>Murphy, Martina; National Maternity Hospital, University College Dublin,<br>Ireland. , Obstetrics and Gynecology<br>Vistad, Ingvild ; Sorlandet Hospital Kristiansand , Obstetric and Gynecology<br>Robson, Michael; National Maternity Hospital, University College Dublin,<br>Ireland. , Obstetrics and Gynecology |
| <b>Primary Subject<br>Heading</b>: | Obstetrics and gynaecology                                                                                                                                                                                                                                                                                                                                                                                                                                                                                                                                                                                                                                                                                                                         |
| Secondary Subject Heading:         | Epidemiology                                                                                                                                                                                                                                                                                                                                                                                                                                                                                                                                                                                                                                                                                                                                       |
| Keywords:                          | cesarean section, quality of care, the 10-Group Classification system, core<br>outcome, labor outcome, neonatal outcome                                                                                                                                                                                                                                                                                                                                                                                                                                                                                                                                                                                                                            |
|                                    |                                                                                                                                                                                                                                                                                                                                                                                                                                                                                                                                                                                                                                                                                                                                                    |

SCHOLARONE™  
Manuscripts

1  
2  
3 **A method to assess obstetric outcomes using the 10-Group Classification System: a**  
4  
5 **quantitative descriptive study**  
6  
7

8  
9  
10 Janne Rossen<sup>1,2</sup>, Miha Lucovnik<sup>3</sup>, Torbjørn Moe Eggebø<sup>2,4,5</sup>, Natasa Tul<sup>3</sup>, Martina Murphy<sup>6</sup>.

11  
12 Ingvild Vistad<sup>1</sup>, Michael Robson<sup>6</sup>  
13  
14

15  
16  
17  
18  
19  
20  
21  
22  
23  
24  
25  
26  
27 Corresponding author:

28  
29 Janne Rossen

30  
31 Department of Obstetrics and Gynecology, Sørlandet Sykehus, Kristiansand

32  
33 PB 416, 4604 Kristiansand

34  
35  
36 Tel: +47 3807300

37  
38 E-mail address: [janne.rossen@gmail.com](mailto:janne.rossen@gmail.com)  
39  
40  
41  
42  
43  
44  
45  
46  
47  
48  
49  
50  
51  
52  
53  
54  
55  
56  
57  
58  
59  
60



## ABSTRACT

**Objectives:** Internationally, the 10-Groups Classification System (TGCS) has been used to report cesarean section rates, but analysis of other outcomes are also recommended. We now aim to present the TGCS as a method to assess outcomes of labor and delivery using routine collection of perinatal information.

**Design:** A methodological study to describe the use of the TGCS

**Setting:** Stavanger University Hospital (SUH) Norway, National Maternity Hospital Dublin (NMH) Ireland and Slovenian National Perinatal Database (SLO) Slovenia

**Participants:** 9848 women from Stavanger University Hospital, Norway, 9250 women from National Maternity Hospital Dublin, Ireland and 106 167 women, from Slovenian National Perinatal Database, Slovenia

**Main outcome measures:** All women were classified according to the TGCS within which cesarean section, oxytocin augmentation, epidural analgesia, operative vaginal deliveries, episiotomy, sphincter rupture, postpartum hemorrhage, blood transfusion, maternal age >35 years, body mass index >30, Apgar score, umbilical cord pH, hypoxic ischemic encephalopathy, antepartum and perinatal deaths were incorporated.

**Results:** There were significant differences in the sizes of the groups of women and the incidences of events and outcomes within the TGCS between the three perinatal databases.

**Conclusions:** The TGCS is a standardized objective classification system where events and outcomes of labor and delivery can be incorporated. Obstetric core events and outcomes should be agreed and defined in order to set standards of care. This method provides continuous and available observations from delivery wards, possibly used for further interpretation, questions and international comparisons. The definition of quality may vary in different units and can only be ascertained when all the necessary information is available and considered together.

**Key words:**

Cesarean section, quality of care, labor outcome, neonatal outcome, the 10-Group Classification System, core outcome

**Abbreviations:**

SUH, Stavanger University Hospital; NMH, National Maternity Hospital; SLO, Slovenian National Perinatal Database; TGCS, the 10-Group Classification System; WHO, World Health Organization; FIGO, The International Federation of Gynecology and Obstetrics

**Strengths and limitations of this study:**

- This study proposes the use of an available method which may elaborate potential trends in delivery units and thus guide labor and delivery management
- Events and outcomes of labor are incorporated in the 10-Group Classification System from three different populations in Europe
- The 10-Group Classification System is limited by unclear definitions of some of the outcomes used and encourage the importance of an agreed set of obstetric core outcomes
- Comparing obstetric outcomes using the 10-Group Classification System do not adjust for risk factors
- The design as a quantitative descriptive study limits the ability to explore causes of the different prevalence's of outcomes and events observed

## INTRODUCTION

Safety, consistency and quality in labor and delivery are key priorities for all labor and delivery units. It is difficult to determine what quality in labor and delivery is, but attempts to develop important outcomes are taking place (1-4). An agreed classification system, incorporating key outcomes that are objective, measurable and relevant to clinical practice is required in order to assess consistency and quality of care.

Clinical practice and guidelines do vary internationally and occasionally also nationally. However, agreeing on a standard classification for assessment of quality of care should be less contentious. It is essential that providers and users of maternity care are aware of events and outcomes in their units and in addition having the ability to compare their results objectively over time and to other units. Only then can assessment of the quality of care take place (5, 6). The emphasis on evidence-based medicine should be supported by prospective databases combined with a multidisciplinary quality audit programme. Acceptance and commitment to this philosophy will provide insight about labor and delivery and importantly ensuring that we are providing safe and quality care (7).

The 10-Group Classification System (TGCS) was first described in 2001 and originally popularized as a method to assess cesarean section rates (8). The intention however, was to introduce a generic perinatal classification to assess all perinatal events and outcomes of which cesarean section is only one. The way the ten groups are structured make them relevant to all clinicians and women themselves and can provide a common language and starting point for any discussion on safety, quality of care and perinatal audit (9). The TGCS is endorsed by the World Health Organization (WHO) and the International Federation of Gynecology and Obstetrics (FIGO) and increasingly used by labor and delivery units to report their cesarean section rates (10-18). The WHO and FIGO also recommend that other events and outcomes surrounding labor and delivery are analyzed in relation to cesarean section using this classification.

This paper classifies data from three perinatal databases in different countries and explores the usefulness of the TGCS as a method to assess the quality of care. It also discusses the challenges that occur even using a standard classification system.

## METHODS

Data related to pregnancies and deliveries were prospectively collected in Stavanger University Hospital (SUH) Norway 2010-2011, National Maternity Hospital Dublin (NMH) Ireland 2011 and Slovenian National Perinatal Database (SLO) Slovenia 2007-2011. The study population included 9848 women in SUH, 9250 women in NMH and 106 167 women in SLO. All women were classified according to the TGCS (Figure 1). The NMH had a complete TGCS-registration initially. A complete registration was also confirmed at SUS and SLO after cross checking of data. Cesarean section was defined as after spontaneous onset, induction or pre-labor. Pre-pregnancy body mass index was calculated as weight in kilograms/height in meters squared. Episiotomies were either lateral or mediolateral and perineal tears affecting the external or the external and internal sphincter were classified as obstetric anal sphincter injuries. The attending midwife or obstetrician visually estimated blood loss and postpartum hemorrhage > 1000 millilitres were registered at SUH and NMH, and postpartum hemorrhage > 500 millilitres in SLO.

Perinatal deaths included all intrauterine deaths after 22 weeks gestational age and within the first week after delivery. Hypoxic ischemic encephalopathy was classified using the Sarnat or modified Sarnat definition as grade I (mild), grade II (moderate) and grade III (severe). All data are presented as descriptive statistic and any comparisons between groups and hospitals described in the manuscript do not represent statistically significant differences.

### Stavanger University Hospital

Stavanger University Hospital has a catchment population of approximately 320 000 and is the regional maternity unit in the west of Norway. It has a tradition of low obstetrical intervention rates. Women with one previous cesarean were encouraged to deliver vaginally. Information related to pregnancies and deliveries was prospectively collected and recorded in an electronic obstetrical journal system (Natus).

The Regional Committee for Medical and Health Research Ethics classified the study as a quality assurance study of routinely recorded data (REK Vest 2012/1522) and the local committee for data protection (2012/41) approved the project.

### National Maternity Hospital

The National Maternity Hospital is a tertiary referral maternity hospital in Dublin, Ireland and one of the largest labor and delivery units in Europe delivering over 9000 women a year. It is well known for its Active Management of Labor philosophy on labor (19). This package of

1  
2  
3 care is based on the prevention of prolonged labor and the physical and emotional sequelae  
4 that follow. Labor and delivery information is collected prospectively on an obstetrical and  
5 neonatal database. The hospital has traditionally for many years completed an Annual Clinical  
6 Report detailing each year's results.  
7  
8  
9

### 10 11 **Slovenian National Database**

12 Slovenia is a European Union member state in Central Europe with approximately 2.1 million  
13 of inhabitants and 20 000 deliveries per year. Health care in Slovenia is a public service  
14 provided through the public health service network. Perinatal care is almost entirely covered  
15 by compulsory health insurance, which is publicly funded. Slovenia has had a National  
16 Perinatal Information System (NPIS) since 1987 and registration into a computerized database  
17 by the attending midwife and doctor is mandatory. Data from all 14 country's maternity unit  
18 are collected. To assure quality of data collection, controls are built in the computerized  
19 system and audited periodically.  
20  
21  
22  
23  
24  
25  
26  
27

### 28 **RESULTS**

29 The populations contained 43%, 46% and 48% nulliparous women in SUH, NMH and SLO.  
30 The overall cesarean section rates were 13.6%, 21.4% and 17.4% in SUH, NMH and SLO,  
31 respectively. The highest rate of cesarean in groups 1 and 2a was observed in SLO. NMH  
32 presents the lowest rate of cesarean in group 3 and SUH the lowest rate in group 5. Rupture of  
33 the uterus was diagnosed in 0.02% (2/9848) women in SUH, no women in NMH and 0.04%  
34 (39/106 167) women in SLO during the study period. The relative sizes of the groups and  
35 cesarean section rates are presented in Table 1.  
36  
37  
38  
39

40  
41 The overall pre-pregnant body mass index > 30 was 9.7%, 12.8%, 8.3% and the  
42 frequency of maternal age >35 years was 14.9%, 32.2%, 14.9% in SUH, NMH and SLO,  
43 respectively. Maternal characteristics stratified according to the TGCS are presented in Table  
44 2.  
45  
46  
47

48 The overall use of epidural analgesia varied from 35.0% at SUH and 49.0% at NMH  
49 to 2.7% in SLO. The overall operative vaginal delivery rate varied from 12.7%, 11.9% and  
50 3.2% in SUH, NMH and SLO, respectively. The overall induction rates were 20.1%, 24.9%  
51 and 23.5% and the frequencies of use of oxytocin were 23.6%, 28.3% and 57.3% in SUH,  
52 NMH and SLO. The overall rates of episiotomy were 19.7%, 28.7% and 32.0% and the rates  
53 of obstetric anal sphincter injuries were 1.5%, 1.5% and 0.3% in SUH, NMH and SLO,  
54 respectively. The overall red cell blood transfusion rate was 2.7%, 1.4% and 0.2% in SUH,  
55  
56  
57  
58  
59  
60

1  
2  
3 NMH and SLO. Labor outcomes stratified according to the TGCS group's 1-5 are presented  
4 in Table 3 and 4.  
5

6 Overall perinatal death in SUH was 4.2 per 1000, in NMH 3.9 per 1000 and 5.0 per  
7 1000 (540/108070) in SLO. Perinatal deaths among groups 1 and 2 together were 1.3‰, 1.4‰  
8 and 1.2‰, among groups 3 and 4 together 0.1‰, 0.8‰ and 1.2‰ and among women with  
9 previous cesarean (group 5) 5.5‰, 0‰ and 0.9‰ in SUH, NMH and SLO, respectively.  
10

11 Neonatal outcomes stratified according to the TGCS 1-5 are presented in Table 5.  
12  
13

## 14 15 16 17 18 **DISCUSSION**

19 Every labor and delivery unit has a responsibility to record and publish their results. The  
20 results also need to be presented in a standardized and structured way, as the management and  
21 implications will vary in different groups of women. Any one event or outcome cannot be  
22 considered on their own without the understanding of any effects on other events, outcomes or  
23 complications. Care during labor and delivery has changed dramatically over the last 30 years  
24 (20). In particular, the cesarean section rate has risen and a common classification system  
25 might be helpful exploring benefits and risks associated to this intervention.  
26  
27  
28  
29  
30  
31

### 32 33 **Limitations**

34 Several challenges were discovered writing this manuscript. When comparing maternal, labor  
35 and perinatal outcomes between units and countries, objective variables (blood transfusion  
36 rates, perinatal deaths) have advantages over subjective assessed outcomes (postpartum  
37 hemorrhage, Apgar score <7 and hypoxic ischemic encephalopathy). In addition, some of our  
38 outcomes were differently defined and registered such as postpartum hemorrhage. This issue  
39 has been recognized and highlighted as a general problem in clinical trials (3, 4, 21).  
40

41 Standardizing and agreeing on which core outcomes to be used to assess quality would not  
42 only increase the usefulness of the information collected but also encourage delivery units to  
43 use the same definitions. Due to different databases and registration, we only succeeded in  
44 completing Table 1 with data from all the 10 groups. Ensuring quality data from national  
45 databases may be challenging and the low rates in SLO particularly of obstetric anal sphincter  
46 injuries and transfusion rates should have been validated. Even more important is the need for  
47 a structured and standardized collection and registration of defined core outcomes in delivery  
48 units and in national registers.  
49  
50  
51  
52  
53  
54  
55  
56  
57  
58  
59  
60

1  
2  
3 We present the use of the TGCS as a method of which possible patterns within the  
4 observed population may uncover. This does not include risk adjustment, which limits the  
5 ability to compare absolute percentages of the outcomes observed. However, by comparing  
6 outcomes and events between standardized groups of women, hypotheses requiring further  
7 attention might be suggested. To explore causality further studies are needed.  
8  
9  
10

### 11 12 13 **The 10-Group Classification System**

14 To achieve good data quality, proper registration and standardized definitions of outcomes are  
15 essential. The ability to classify all deliveries into one of the ten groups is however a quality  
16 indicator which many institutions, countries and perinatal databases struggle to do (5).  
17 Stressing this issue is important as the reliability of the data may affect the interpretation if the  
18 number of unclassified cases is significant. By presenting data using the TGCS, the ability to  
19 demonstrate significant differences in smaller units is limited. However, examining even a  
20 small number of cases may be helpful to develop local strategies to improve the quality of  
21 care (14). Risk is not only the chance of certain events occurring but also the implications if it  
22 did occur.  
23  
24  
25  
26  
27  
28

29 The TGCS presents a method of risk stratification, which visualizes how the cesarean  
30 section rate varies between different units and countries. Interpretation of other outcomes in  
31 the different groups may be used as a guidance to assess obstetric quality. Cesarean section  
32 rates can only be evaluated if perinatal and maternal outcomes are included (14, 22). Using  
33 the TGCS, there are only three possible explanations for differences in the sizes of the groups  
34 and the events and outcomes within the groups: data quality, significant differences in  
35 important epidemiological variables and differences in clinical practice (9).  
36  
37  
38  
39  
40

41 To improve management in labor and optimizing care, collection and simple  
42 interpretation of data are necessary (1). The data quality must be validated and by working  
43 together at multiple levels within the unit, improvements and adverse trends can be detected  
44 (2). The TGCS is shown to be consistent in size and the different cesarean section rates in the  
45 groups together with the size allow an informative interpretation of a given overall cesarean  
46 section rate (Table 1). When other epidemiological information, events, outcomes and  
47 processes are analyzed within the different groups as opposed to a proportion of the overall  
48 population, they increase in relevance. The TGCS do not adjust for risk factors, but by  
49 quantifying patient's populations and different practice patterns it allows a comparison of  
50 clinical value and may encourage a more in depth analysis of individual groups or sub-groups.  
51 Following are some examples of how our observations may be interpreted.  
52  
53  
54  
55  
56  
57  
58  
59  
60

1  
2  
3 Focusing on the management of both physical and emotional care of nulliparous  
4 women (group 1) is important as this will prevent the cesarean rate from a further increase  
5 when these women return for a future delivery (23, 24). SLO has an overall lower cesarean  
6 section rate than NMH, but a higher cesarean section rate of 10% in group 1 (Table 1). Table  
7 5 shows that lower cesarean section rates at SUH and NMH do not compromise good  
8 perinatal outcome.  
9  
10

11  
12 A greater than a 2:1 ratio of the size of groups 1 and 2 reflects a low intervention rate  
13 in term single cephalic nulliparous women (5). This is influenced by culture, obstetric practice  
14 and case mix of the particular population. The ratios in our populations were 3.1, 1.7, and 3.3,  
15 SUH, NMH, SLO, respectively. The definition of pre-labor cesarean will additionally define  
16 in which group the women are classified (group 1 or group 2b) with an impact of this ratio.  
17 Clearly, the benefits of labor induction must be weighed against the potential maternal and  
18 fetal risks associated with the procedure, as well as knowledge of the population and the  
19 incidence of antenatal stillbirths (23, 25). Maternity care before and in relation to the  
20 management of labor will further influence to which group and following risk the woman  
21 belongs to in her next pregnancy (group 3, 4 or 5) (10). The rate of cesarean section in the  
22 subsequent pregnancy was 5.3%, 3.8%, 5.1% (SUH, NMH, SLO respectively) in women  
23 without a previous cesarean (group 3 and 4 combined) compared to 46.0%, 60.5%, 74.7%  
24 (SUH, NMH SLO respectively) in women with a previous cesarean (group 5).  
25  
26  
27  
28  
29  
30  
31  
32  
33  
34

35 As presented in Table 2, the women delivering at NMH were in all groups older than  
36 the women delivering at SUH and in SLO. When comparing cesarean section rates (Table 1),  
37 the low rate at NMH in group 1 might reflect a certain type of labor management as high  
38 maternal age is normally associated with an increased incidence of interventions.  
39  
40

41 SUH has the lowest overall cesarean section rate and the lowest overall use of  
42 oxytocin. However, stratified by the TGCS, the use of oxytocin at SUH was lowest in group 1  
43 only. SUH practice a judicious use of oxytocin that includes a definition of the start of active  
44 labor, prolonged labor and thereby indication for oxytocin use, which differ from NMH and  
45 SLO (26). Compared to NMH and their philosophy of prevention of prolonged labor this may  
46 lead to more labors that are prolonged. The package of Active Management of Labor with one  
47 to one care and its advantages practiced at NMH and in SLO, has always been an issue of  
48 much debate (27). The role of oxytocin in labor management is important, but the optimal  
49 dose and timing is yet to be revealed (26). The different types of labor management probably  
50 explain the different rates of oxytocin augmentation and prolonged labors observed (Table 3  
51 and 4).  
52  
53  
54  
55  
56  
57  
58  
59  
60



1  
2  
3 Furthermore, by using the TGCS, a higher rate of obstetric anal sphincter injuries  
4 among women in group 2a and 5 at SUH is evident which deserves closer investigation. The  
5 overall rate of severe postpartum hemorrhage at SUH, is relatively at least, high and in  
6 addition proportionally higher than the transfusion rates (28). This highlights the importance  
7 of analyzing both subjective (estimated blood loss) outcomes together with objective  
8 (transfusion rates) when evaluating obstetric practice (21, 29).  
9  
10

11  
12 Compared to SUH and NMH, the operative vaginal delivery rate is lower in SLO. The  
13 risk of adverse maternal and neonatal outcomes increases with an operative vaginal delivery  
14 but if the alternative is a cesarean at full dilatation, the risk benefit ratio must be carefully  
15 considered (30). Occurrence of maternal and neonatal complications is, however, similar to  
16 SUH and NMH with the exception of lower sphincter rupture rates in all groups.  
17  
18  
19  
20  
21

## 22 **Conclusion**

23  
24 Cesarean section rates, maternal characteristics together with labor and fetal outcomes need to  
25 be defined by using the same classification system. We propose the TGCS as the standardized  
26 method of assessing events and outcomes and comparing inter-institutional rates, which may  
27 contribute to the judgment of quality of care in labor and delivery. By working together and  
28 sharing our knowledge, we can learn from each other. The first step in providing quality of  
29 care is to be aware of your results.  
30  
31  
32  
33  
34  
35

## 36 **Authors affiliations:**

37  
38 <sup>1</sup> Department of Obstetrics and Gynecology, Sørlandet Hospital HF Kristiansand, Norway,

39  
40 <sup>2</sup>Department of Laboratory Medicine, Children's and Women's Health, Norwegian University  
41 of Science and Technology, Trondheim, Norway,

42  
43 <sup>3</sup> Department of Perinatology, Division of Obstetrics and Gynecology, University Medical  
44 Center Ljubljana, Slovenia,

45  
46 <sup>4</sup> Department of Obstetrics and Gynecology, Stavanger University Hospital, Norway, <sup>5</sup>  
47 National Center for Fetal Medicine, Trondheim University Hospital, St Olavs Hospital,  
48 Trondheim, Norway,

49  
50 <sup>6</sup> National Maternity Hospital, Dublin, Ireland  
51  
52  
53  
54  
55

56 **Contributors:** JR, ML, TME and MR have contributed to the idea and design of the study.

57 JR, ML, NT, MM and TME have contributed to the preparation of the data used. JR, TME, IV  
58  
59  
60

and MR have assisted the literature research and editing of the manuscript. All authors have read and approved the final manuscript.

**Funding:** The authors have no financial and material support to report.

**Conflicts of interest notification:** Michael Robson developed the 10-Group classification system. The authors have no conflicts of interest.

**Data sharing statement:** There are no additional data available.

1. Sibanda T, Fox R, Draycott TJ, Mahmood T, Richmond D, Simms RA. Intrapartum care quality indicators: a systematic approach for achieving consensus. *Eur J Obstet Gynecol Reprod Biol.* 2013;166(1):23-9.
2. Sprague AE, Dunn SI, Fell DB, Harrold J, Walker MC, Kelly S, et al. Measuring quality in maternal-newborn care: developing a clinical dashboard. *J Obstet Gynaecol Can.* 2013;35(1):29-38.
3. Khan K, Chief Editors of Journals participating in The CI. The CROWN Initiative: journal editors invite researchers to develop core outcomes in women's health. *BJOG.* 2016;123 Suppl 3:103-4.
4. Geirsson RT, Eggebo T. Core outcomes for reporting women's health. *Acta Obstet Gynecol Scand.* 2014;93(9):843-4.
5. Robson M, Hartigan L, Murphy M. Methods of achieving and maintaining an appropriate caesarean section rate. *Best Pract Res Clin Obstet Gynaecol.* 2013;27:297-308.
6. Gee RE, Winkler R. Quality measurement: what it means for obstetricians and gynecologists. *Obstet Gynecol.* 2013;121(3):507-10.
7. Lawrence HC, 3rd, Copel JA, O'Keefe DF, Bradford WC, Scarrow PK, Kennedy HP, et al. Quality patient care in labor and delivery: a call to action. *Am J Obstet Gynecol.* 2012;207(3):147-8.
8. Robson MS. Classification of caesarean sections. *Fetal Matern Med Rev.* 2001;Vol.12(1):23-39.
9. Robson M. The Ten Group Classification System (TGCS) - a common starting point for more detailed analysis. *BJOG.* 2015;122(5):701.
10. Brennan DJ, Robson MS, Murphy M, O'Herlihy C. Comparative analysis of international cesarean delivery rates using 10-group classification identifies significant variation in spontaneous labor. *American Journal of Obstetrics and Gynecology.* 2009;201(3):308 e1-8.
11. Fischer A, LaCoursiere DY, Barnard P, Bloebaum L, Varner M. Differences between hospitals in cesarean rates for term primigravidas with cephalic presentation. *Obstet Gynecol.* 2005;105(4):816-21.
12. Scarella A, Chamy V, Sepulveda M, Belizan JM. Medical audit using the Ten Group Classification System and its impact on the cesarean section rate. *European Journal of Obstetrics, Gynecology, and Reproductive Biology.* 2011;154(2):136-40.
13. Ciriello E, Locatelli A, Incerti M, Ghidini A, Andreani M, Plevani C, et al. Comparative analysis of cesarean delivery rates over a 10-year period in a single

- 1  
2  
3 Institution using 10-class classification. *J Matern Fetal Neonatal Med.*  
4 2012;25(12):2717-20.
- 5 14. Homer CS, Kurinczuk JJ, Spark P, Brocklehurst P, Knight M. A novel use of a  
6 classification system to audit severe maternal morbidity. *Midwifery.*  
7 2010;26(5):532-6.
- 8 15. Betran AP, Torloni MR, Zhang JJ, Gulmezoglu AM, Section WHOWGoC. WHO  
9 Statement on Caesarean Section Rates. *BJOG.* 2016;123(5):667-70.
- 10 16. Figo Working Group On Challenges In Care Of M, Infants During L, Delivery. Best  
11 practice advice on the 10-Group Classification System for cesarean deliveries. *Int*  
12 *J Gynaecol Obstet.* 2016;135(2):232-3.
- 13 17. Chong C, Su LL, Biswas A. Changing trends of cesarean section births by the  
14 Robson Ten Group Classification in a tertiary teaching hospital. *Acta Obstet*  
15 *Gynecol Scand.* 2012;91(12):1422-7.
- 16 18. Minsart AF, De Spiegelaere M, Englert Y, Buekens P. Classification of cesarean  
17 sections among immigrants in Belgium. *Acta Obstet Gynecol Scand.*  
18 2013;92(2):204-9.
- 19 19. O'Driscoll K, Foley M, MacDonald D. Active management of labor as an alternative  
20 to cesarean section for dystocia. *Obstetrics and Gynecology.* 1984;63(4):485-90.
- 21 20. Laughon SK, Branch DW, Beaver J, Zhang J. Changes in labor patterns over 50  
22 years. *Am J Obstet Gynecol.* 2012;206(5):419 e1-9.
- 23 21. Rath WH. Postpartum hemorrhage--update on problems of definitions and  
24 diagnosis. *Acta Obstet Gynecol Scand.* 2011;90(5):421-8.
- 25 22. Nippita TA, Lee YY, Patterson JA, Ford JB, Morris JM, Nicholl MC, et al. Variation in  
26 hospital caesarean section rates and obstetric outcomes among nulliparae at  
27 term: a population-based cohort study. *BJOG.* 2015;122(5):702-11.
- 28 23. Brennan DJ, Murphy M, Robson MS, O'Herlihy C. The singleton, cephalic,  
29 nulliparous woman after 36 weeks of gestation: contribution to overall cesarean  
30 delivery rates. *Obstet Gynecol.* 2011;117(2 Pt 1):273-9.
- 31 24. Barber EL, Lundsberg LS, Belanger K, Pettker CM, Funai EF, Illuzzi JL. Indications  
32 contributing to the increasing cesarean delivery rate. *Obstet Gynecol.*  
33 2011;118(1):29-38.
- 34 25. ACOG Practice Bulletin No. 107: Induction of labor. *Obstetrics and gynecology.*  
35 2009;Aug;114(2 Pt 1):386-97.
- 36 26. Rossen J, Ostborg TB, Lindtjorn E, Schulz J, Eggebo TM. Judicious use of oxytocin  
37 augmentation for the management of prolonged labor. *Acta Obstet Gynecol*  
38 *Scand.* 2016;95(3):355-61.
- 39 27. Brown HC, Paranjothy S, Dowswell T, Thomas J. Package of care for active  
40 management in labour for reducing caesarean section rates in low-risk women.  
41 *Cochrane Database Syst Rev.* 2013;9:CD004907.
- 42 28. Mousa HA, Alfirevic Z. Treatment for primary postpartum haemorrhage.  
43 *Cochrane Database Syst Rev.* 2007(1):CD003249.
- 44 29. Woiski MD, Scheepers HC, Liefers J, Lance M, Middeldorp JM, Lotgering FK, et al.  
45 Guideline-based development of quality indicators for prevention and  
46 management of postpartum hemorrhage. *Acta Obstet Gynecol Scand.*  
47 2015;94(10):1118-27.
- 48 30. Walsh CA, Robson M, McAuliffe FM. Mode of delivery at term and adverse  
49 neonatal outcomes. *Obstet Gynecol.* 2013;121(1):122-8.
- 50  
51  
52  
53  
54  
55  
56  
57  
58  
59  
60

1  
2  
3  
4  
5  
6  
7  
8  
9  
10  
11  
12  
13  
14  
15  
16  
17  
18 **Legends:**  
19

20  
21 Table 1 The 10-Group Classification System for Stavanger University Hospital, Norway,  
22 National Maternity Hospital Dublin, Ireland, Slovenian National Perinatal Database, Slovenia  
23 2007-2011  
24

25  
26 Table 2 Maternal characteristics stratified in the 10-Group Classification System groups 1-5  
27

28  
29 Table 3 Labor outcomes stratified in the 10-Group Classification System groups 1-5  
30

31  
32 Table 4 Labor outcomes stratified in the 10-Group Classification System groups 1-5  
33

34  
35 Table 5 Neonatal outcomes stratified in the 10-Group Classification System groups 1-5  
36  
37

38  
39 Figure 1 The 10-Group Classification System  
40  
41  
42  
43  
44  
45  
46  
47  
48  
49  
50  
51

52 Table 1 The 10-Group Classification System for Stavanger University Hospital, Norway,  
53 National Maternity Hospital Dublin, Ireland, Slovenian National Perinatal Database, Slovenia  
54 2007-2011  
55  
56  
57  
58  
59  
60

|          | Relative size of the group (%) |      |      | CD rate in each group (%) |                    |                       | Contribution made to overall CD rate (%) |                        |                        |
|----------|--------------------------------|------|------|---------------------------|--------------------|-----------------------|------------------------------------------|------------------------|------------------------|
|          | SUH                            | NMH  | SLO  | SUH<br>(340/9848)         | NMH<br>(1980/9250) | SLO<br>(18454/106167) | SUH<br>CD rate<br>13.6                   | NMH<br>CD rate<br>21.4 | SLO<br>CD rate<br>17.4 |
| Overall  |                                |      |      |                           |                    |                       |                                          |                        |                        |
| Group 1  | 28.9                           | 25.8 | 33.2 | 6.5                       | 7.4                | 10.0                  | 1.9                                      | 1.9                    | 3.3                    |
| Group 2  | 9.3                            | 14.8 | 10.1 | 25.7                      | 34.9               | 30.4                  | 2.4                                      | 5.3                    | 3.1                    |
| Group 2a | 8.6                            | 13.8 | 9.1  | 19.6                      | 30.2               | 23.0                  | 1.7                                      | 4.2                    | 2.1                    |
| Group 2b | 0.5                            | 1.0  | 1.0  | 100.0                     | 100.0              | 100.0                 | 0.5                                      | 1.0                    | 1.0                    |
| Group 3  | 37.9                           | 29.8 | 32.3 | 1.7                       | 1.1                | 2.4                   | 0.6                                      | 0.3                    | 0.8                    |
| Group 4  | 9.7                            | 9.4  | 8.8  | 19.5                      | 12.7               | 14.9                  | 1.9                                      | 1.2                    | 1.3                    |
| Group 4a | 8.4                            | 8.7  | 7.9  | 6.4                       | 5.8                | 4.2                   | 0.5                                      | 0.5                    | 0.3                    |
| Group 4b | 1.3                            | 0.7  | 1.0  | 100.0                     | 100.0              | 100.0                 | 1.3                                      | 0.7                    | 1.0                    |
| Group 5  | 5.5                            | 10.2 | 4.8  | 46.0                      | 60.9               | 74.7                  | 2.5                                      | 6.2                    | 3.6                    |
| Group 6  | 1.8                            | 2.4  | 2.3  | 79.4                      | 93.2               | 82.6                  | 1.5                                      | 2.2                    | 1.9                    |
| Group 7  | 1.0                            | 1.4  | 1.1  | 66.7                      | 85.0               | 71.7                  | 0.6                                      | 1.2                    | 0.8                    |
| Group 8  | 1.7                            | 2.2  | 1.8  | 40.8                      | 64.9               | 54.2                  | 0.7                                      | 1.4                    | 1.0                    |
| Group 9  | 0.2                            | 0.4  | 0.6  | 100.0                     | 100                | 92.8                  | 0.2                                      | 0.4                    | 0.6                    |
| Group 10 | 4.0                            | 3.7  | 4.9  | 31.9                      | 37.6               | 22.1                  | 1.3                                      | 1.4                    | 1.1                    |

SUH, Stavanger University Hospital 2010-2011; NMH, National Maternity Hospital 2011; SLO, Slovenian National Perinatal Database 2007-2011

Table 2: Maternal characteristics stratified in the 10-Group Classification System groups 1-5

|          | Body mass index > 30 |      |      | Maternal age > 35 years |      |      |
|----------|----------------------|------|------|-------------------------|------|------|
|          | %                    |      |      | %                       |      |      |
|          | SUH                  | NMH  | SLO  | SUH                     | NMH  | SLO  |
| Group 1  | 5.3                  | 8.1  | 5.1  | 5.2                     | 16.7 | 6.3  |
| Group 2a | 10.3                 | 12.7 | 11.0 | 10.7                    | 25.4 | 8.1  |
| Group 2b | 9.8                  | 11.2 | 11.6 | 21.7                    | 46.7 | 23.4 |
| Group 3  | 6.1                  | 11.4 | 8.2  | 18.5                    | 37.3 | 20.5 |
| Group 4a | 12.6                 | 16.1 | 14.9 | 23.0                    | 45.9 | 23.7 |
| Group 4b | 16.7                 | 14.3 | 16.6 | 32.8                    | 57.1 | 27.8 |
| Group 5  | 11.6                 | 19.1 | 14.8 | 26.7                    | 46.2 | 23.8 |

SUH, Stavanger University Hospital 2010-2011; NMH, National Maternity Hospital 2011; SLO, Slovenian National Perinatal Database 2007-2011

Table 3 Labor outcomes stratified in the 10-Group Classification System groups 1-5

|          | Accelerated position Oxytocin |      |      | Obstetrical haemorrhage |     |     | Postpartum haemorrhage > 1000 ml |     |     | Operative vaginal delivery |      |     |
|----------|-------------------------------|------|------|-------------------------|-----|-----|----------------------------------|-----|-----|----------------------------|------|-----|
|          | %                             | %    | %    | %                       | %   | %   | %                                | %   | %   | %                          | %    | %   |
|          | SUH                           | NMH  | SLO  | SUH                     | NMH | SLO | SUH                              | NMH | SLO | SUH                        | NMH  | SLO |
| Group 1  | 35.8                          | 56.8 | 50.9 | 2.4                     | 2.5 | 0.4 | 11.3                             | 2.8 | 1.2 | 23.7                       | 24.6 | 5.9 |
| Group 2a | 40.6                          | 46.1 | 45.8 | 3.7                     | 2.2 | 0.4 | 9.9                              | 5.8 | 1.6 | 31.9                       | 23.4 | 7.2 |
| Group 2b | -                             | -    | -    | -                       | -   | -   | -                                | -   | -   | -                          | -    | -   |
| Group 3  | 7.3                           | 8.8  | 20.4 | 0.6                     | 1.0 | 0.2 | 2.5                              | 0.2 | 0.1 | 3.5                        | 2.5  | 0.7 |
| Group 4a | 11.8                          | 12.2 | 21.8 | 0.6                     | 0.6 | 0.2 | 3.4                              | 0.4 | 0.2 | 6.7                        | 4.9  | 1.3 |
| Group 4b | -                             | -    | -    | -                       | -   | -   | -                                | -   | -   | -                          | -    | -   |
| Group 5  | 17.9                          | 18.7 | 12.1 | 2.4                     | 0.6 | 0.1 | 10.1                             | 0.1 | 0.2 | 13.8                       | 8.3  | 1.7 |

SUH, Stavanger University Hospital 2010-2011; NMH, National Maternity Hospital 2011; SLO, Slovenian National Perinatal Database 2007-2011

-, not applicable

Table 4 Labor outcomes stratified in the 10-Groups Classification System groups 1-5

|                            | SUH  | NMH  | SLO  | SUH  | NMH  | SLO | SUH               | NMH | SLO                     | SUH | NMH | SLO       |
|----------------------------|------|------|------|------|------|-----|-------------------|-----|-------------------------|-----|-----|-----------|
| Group 1                    | 33.2 | 53.2 | 69.1 | 43.7 | 73.7 | 4.2 | 4.5               | 1.0 | x                       | 2.6 | 1.5 | 0.2       |
| Group 2a<br>Apgar score <7 | 68.3 | 69.0 | 79.4 | 71.8 | 76.1 | 5.3 | Antepartum<br>0.9 | 3.1 | Hypoxic-ischemic<br>2.2 | 3.1 | 0.2 | Perinatal |
| Group 2b                   | -    | -    | -    | -    | -    | -   | 17.6              | 1.1 | x                       | 2.0 | x   | 0.4       |
| Group 3                    | 6.7  | 4.0  | 43.5 | 19.2 | 34.9 | 1.2 | 2.5               | 0.5 | x                       | 2.8 | 0.7 | 0.1       |
| Group 4a                   | 46.9 | 25.0 | 68.5 | 44.7 | 48.2 | 2.6 | 4.1               | 1.1 | x                       | 3.0 | 1.0 | 0.3       |
| Group 4b                   | -    | -    | -    | -    | -    | -   | 5.6               | 4.8 | x                       | 1.6 | x   | 0.6       |
| Group 5                    | 12.7 | 9.0  | 23.0 | 39.8 | 31.7 | 1.5 | 5.7               | 1.6 | x                       | 1.8 | 2.0 | 0.2       |

SUH, Stavanger University Hospital 2010-2011; NMH, National Maternity Hospital 2011; SLO, Slovenian National Perinatal Database 2007-2011

-; not applicable

X; missing data

Table 5 Neonatal outcomes stratified in the 10-Group Classification System groups 1-5



|          | at 5 min |     |     | pH<7.0 |     |     | %o  |     |     | encephalopathy |     |     | death |     |     |
|----------|----------|-----|-----|--------|-----|-----|-----|-----|-----|----------------|-----|-----|-------|-----|-----|
|          | %        |     |     | %      |     |     | ‰   |     |     | ‰              |     |     | ‰     |     |     |
|          | SUH      | NMH | SLO | SUH    | NMH | SLO | SUH | NMH | SLO | SUH            | NMH | SLO | SUH   | NMH | SLO |
| Group 1  | 0.9      | 1.1 | 0.4 | 0.6    | 0.5 | x   | 0.7 | 0   | 0.5 | 1.1            | 3.4 | 0.8 | 1.1   | 0   | 0.7 |
| Group 2a | 2.5      | 1.6 | 0.8 | 0.5    | 0.3 | x   | 2.4 | 3.1 | 3.0 | 1.1            | 4.3 | 1.4 | 2.4   | 3.9 | 3.2 |
| Group 2b | 0        | x   | 0.7 | 0      | x   | x   | 0   | 0   | 0.9 | 0              | 0.1 | 1.6 | 0     | 0   | 1.9 |
| Group 3  | 0.4      | 0.3 | 0.1 | 0.2    | 0   | x   | 0.5 | 0.4 | 0.5 | 0.5            | 0.4 | 0.3 | 0.5   | 0.4 | 0.6 |
| Group 4a | 0.2      | 0.9 | 0.3 | 0.4    | 0.9 | x   | 2.4 | 1.2 | 3.6 | 0              | 0   | 0.5 | 2.4   | 2.3 | 3.9 |
| Group 4b | 0        | x   | 0.8 | 0      | x   | x   | 7.5 | 0   | 1.0 | 0              | 0.3 | 0.7 | 7.5   | 0   | 0.1 |
| Group 5  | 1.3      | 0.2 | 0.6 | 0      | 0.4 | x   | 5.5 | 0   | 0.8 | 1.8            | 0   | 0.6 | 5.5   | 0   | 1.0 |

SUH, Stavanger University Hospital 2010-2011; NMH, National Maternity Hospital 2011; SLO, Slovenian National Perinatal Database 2007-2011  
 X; missing data

| Group | Description                                                                                         |
|-------|-----------------------------------------------------------------------------------------------------|
| 1     | Nulliparous, single cephalic, $\geq 37$ weeks, spontaneous labor                                    |
| 2a    | Nulliparous, single cephalic, $\geq 37$ weeks, induced labor                                        |
| 2b    | Nulliparous, single cephalic, $\geq 37$ weeks, cesarean before labor                                |
| 3     | Multiparous (excluding previous cesareans), single cephalic, $\geq 37$ weeks, spontaneous labor     |
| 4a    | Multiparous (excluding previous cesareans), single cephalic, $\geq 37$ weeks, induced labor         |
| 4b    | Multiparous (excluding previous cesareans), single cephalic, $\geq 37$ weeks, cesarean before labor |
| 5     | Previous cesarean, single cephalic $\geq 37$ weeks                                                  |
| 6     | All nulliparous breeches                                                                            |
| 7     | All multiparous breeches (including previous cesareans)                                             |
| 8     | All multiple pregnancies (including previous cesareans)                                             |
| 9     | All abnormal lies (including previous cesareans)                                                    |
| 10    | All single cephalic, $\leq 36$ weeks (including previous cesareans)                                 |

Figure 1 The 10-Group Classification system

**STROBE 2007 (v4) checklist of items to be included in reports of observational studies in epidemiology\***  
**Checklist for cohort, case-control, and cross-sectional studies (combined)**

| Section/Topic             | Item # | Recommendation                                                                                                                                                                                                                                                                                                                                                                                                                                                         | Reported on page # |
|---------------------------|--------|------------------------------------------------------------------------------------------------------------------------------------------------------------------------------------------------------------------------------------------------------------------------------------------------------------------------------------------------------------------------------------------------------------------------------------------------------------------------|--------------------|
| Title and abstract        | 1      | (a) Indicate the study's design with a commonly used term in the title or the abstract                                                                                                                                                                                                                                                                                                                                                                                 | 1 and 2            |
|                           |        | (b) Provide in the abstract an informative and balanced summary of what was done and what was found                                                                                                                                                                                                                                                                                                                                                                    | 2                  |
| <b>Introduction</b>       |        |                                                                                                                                                                                                                                                                                                                                                                                                                                                                        |                    |
| Background/rationale      | 2      | Explain the scientific background and rationale for the investigation being reported                                                                                                                                                                                                                                                                                                                                                                                   | 4                  |
| Objectives                | 3      | State specific objectives, including any pre-specified hypotheses                                                                                                                                                                                                                                                                                                                                                                                                      | 4                  |
| <b>Methods</b>            |        |                                                                                                                                                                                                                                                                                                                                                                                                                                                                        |                    |
| Study design              | 4      | Present key elements of study design early in the paper                                                                                                                                                                                                                                                                                                                                                                                                                | 4, introduction    |
| Setting                   | 5      | Describe the setting, locations, and relevant dates, including periods of recruitment, exposure, follow-up, and data collection                                                                                                                                                                                                                                                                                                                                        | 5 and 6            |
| Participants              | 6      | (a) <i>Cohort study</i> —Give the eligibility criteria, and the sources and methods of selection of participants. Describe methods of follow-up<br><i>Case-control study</i> —Give the eligibility criteria, and the sources and methods of case ascertainment and control selection. Give the rationale for the choice of cases and controls<br><i>Cross-sectional study</i> —Give the eligibility criteria, and the sources and methods of selection of participants | 5 and 6            |
|                           |        | (b) <i>Cohort study</i> —For matched studies, give matching criteria and number of exposed and unexposed<br><i>Case-control study</i> —For matched studies, give matching criteria and the number of controls per case                                                                                                                                                                                                                                                 | Not applicable     |
| Variables                 | 7      | Clearly define all outcomes, exposures, predictors, potential confounders, and effect modifiers. Give diagnostic criteria, if applicable                                                                                                                                                                                                                                                                                                                               | 5                  |
| Data sources/ measurement | 8*     | For each variable of interest, give sources of data and details of methods of assessment (measurement). Describe comparability of assessment methods if there is more than one group                                                                                                                                                                                                                                                                                   | Not applicable     |
| Bias                      | 9      | Describe any efforts to address potential sources of bias                                                                                                                                                                                                                                                                                                                                                                                                              | 5 and 6            |
| Study size                | 10     | Explain how the study size was arrived at                                                                                                                                                                                                                                                                                                                                                                                                                              | 5                  |
| Quantitative variables    | 11     | Explain how quantitative variables were handled in the analyses. If applicable, describe which groupings were chosen and why                                                                                                                                                                                                                                                                                                                                           | 5                  |
| Statistical methods       | 12     | (a) Describe all statistical methods, including those used to control for confounding                                                                                                                                                                                                                                                                                                                                                                                  | Not applicable     |
|                           |        | (b) Describe any methods used to examine subgroups and interactions                                                                                                                                                                                                                                                                                                                                                                                                    | Not applicable     |
|                           |        | (c) Explain how missing data were addressed                                                                                                                                                                                                                                                                                                                                                                                                                            | Excluded           |
|                           |        | (d) <i>Cohort study</i> —If applicable, explain how loss to follow-up was addressed<br><i>Case-control study</i> —If applicable, explain how matching of cases and controls was addressed                                                                                                                                                                                                                                                                              | Nor applicable     |

|                   |     |                                                                                                                                                                                                              |                                                                                                                        |
|-------------------|-----|--------------------------------------------------------------------------------------------------------------------------------------------------------------------------------------------------------------|------------------------------------------------------------------------------------------------------------------------|
|                   |     | <i>Cross-sectional study</i> —If applicable, describe analytical methods taking account of sampling strategy                                                                                                 |                                                                                                                        |
|                   |     | (e) Describe any sensitivity analyses                                                                                                                                                                        | Not applicable                                                                                                         |
| <b>Results</b>    |     |                                                                                                                                                                                                              |                                                                                                                        |
| Participants      | 13* | (a) Report numbers of individuals at each stage of study—eg numbers potentially eligible, examined for eligibility, confirmed eligible, included in the study, completing follow-up, and analysed            | 5 and Table 1                                                                                                          |
|                   |     | (b) Give reasons for non-participation at each stage                                                                                                                                                         | Not applicable                                                                                                         |
|                   |     | (c) Consider use of a flow diagram                                                                                                                                                                           | Not applicable                                                                                                         |
| Descriptive data  | 14* | (a) Give characteristics of study participants (eg demographic, clinical, social) and information on exposures and potential confounders                                                                     | Table 1 and 2                                                                                                          |
|                   |     | (b) Indicate number of participants with missing data for each variable of interest                                                                                                                          | Table 1                                                                                                                |
|                   |     | (c) <i>Cohort study</i> —Summarise follow-up time (eg, average and total amount)                                                                                                                             | 5 (MM)                                                                                                                 |
| Outcome data      | 15* | <i>Cohort study</i> —Report numbers of outcome events or summary measures over time                                                                                                                          |                                                                                                                        |
|                   |     | <i>Case-control study</i> —Report numbers in each exposure category, or summary measures of exposure                                                                                                         |                                                                                                                        |
|                   |     | <i>Cross-sectional study</i> —Report numbers of outcome events or summary measures                                                                                                                           | Table 3,4 and 5                                                                                                        |
| Main results      | 16  | (a) Give unadjusted estimates and, if applicable, confounder-adjusted estimates and their precision (eg, 95% confidence interval). Make clear which confounders were adjusted for and why they were included | Table 1-5. Confidence intervals can be calculated, but are not included                                                |
|                   |     | (b) Report category boundaries when continuous variables were categorized                                                                                                                                    | Not applicable                                                                                                         |
|                   |     | (c) If relevant, consider translating estimates of relative risk into absolute risk for a meaningful time period                                                                                             | Not applicable                                                                                                         |
| Other analyses    | 17  | Report other analyses done—eg analyses of subgroups and interactions, and sensitivity analyses                                                                                                               |                                                                                                                        |
| <b>Discussion</b> |     |                                                                                                                                                                                                              |                                                                                                                        |
| Key results       | 18  | Summarise key results with reference to study objectives                                                                                                                                                     | 8                                                                                                                      |
| Limitations       | 19  | Discuss limitations of the study, taking into account sources of potential bias or imprecision. Discuss both direction and magnitude of any potential bias                                                   | 7 and 8                                                                                                                |
| Interpretation    | 20  | Give a cautious overall interpretation of results considering objectives, limitations, multiplicity of analyses, results from similar studies, and other relevant evidence                                   | This method of the expanded use of TGCS is earlier not presented. Limitations (page 7 and 8) and interpretations (page |

|                          |    |                                                                                                                                                               |                            |
|--------------------------|----|---------------------------------------------------------------------------------------------------------------------------------------------------------------|----------------------------|
|                          |    |                                                                                                                                                               | 8-10) are being discussed. |
| Generalisability         | 21 | Discuss the generalisability (external validity) of the study results                                                                                         | 8 and 10 (conclusion)      |
| <b>Other information</b> |    |                                                                                                                                                               |                            |
| Funding                  | 22 | Give the source of funding and the role of the funders for the present study and, if applicable, for the original study on which the present article is based | 11 (not applicable)        |

\*Give information separately for cases and controls in case-control studies and, if applicable, for exposed and unexposed groups in cohort and cross-sectional studies.

**Note:** An Explanation and Elaboration article discusses each checklist item and gives methodological background and published examples of transparent reporting. The STROBE checklist is best used in conjunction with this article (freely available on the Web sites of PLoS Medicine at <http://www.plosmedicine.org/>, Annals of Internal Medicine at <http://www.annals.org/>, and Epidemiology at <http://www.epidem.com/>). Information on the STROBE Initiative is available at [www.strobe-statement.org](http://www.strobe-statement.org).
